# Supplementary material
Source: Royal Society of Chemistry journal article supplement (doi:10.1039/d6gc01139j)
Supplement: d6gc01139j1.pdf [file d6gc01139j1.pdf]

# **Combining Rational Design and Computational Tools in Multi-Parameter Enzyme Engineering to Increase the Fitness of a CYP152 Peroxygenase for $\alpha$ -Hydroxylation of Fatty Acids**

Stephan Vrabl, Klara Bangert, Enrico F. Semeraro,  
Wolfgang Kroutil

**SUPPLEMENTARY INFORMATION**

|                                                                                                              |    |
|--------------------------------------------------------------------------------------------------------------|----|
| Contents                                                                                                     |    |
| Supplementary data .....                                                                                     | 3  |
| Calculation of relative per-residue solvent accessible surface area.....                                     | 3  |
| Analytical-scale biotransformation of <b>1a</b> in batch.....                                                | 5  |
| Supplementary methods.....                                                                                   | 6  |
| Gene synthesis .....                                                                                         | 6  |
| Protein expression and purification .....                                                                    | 6  |
| CO-spectral assay (difference spectroscopy) .....                                                            | 10 |
| H <sub>2</sub> O <sub>2</sub> -Mediated enzyme inactivation studies .....                                    | 11 |
| Determination of specific activity.....                                                                      | 11 |
| Scoring of PO <sub>SPα</sub> variants (performance scores).....                                              | 12 |
| Analytical-scale biotransformations conducted in fed-batch.....                                              | 13 |
| Analytical-scale biotransformations conducted in batch.....                                                  | 14 |
| Analytical-scale biotransformations for the over-oxidation of <b>2a</b> .....                                | 14 |
| Molecular docking of ( <i>S</i> )- and ( <i>R</i> )- <b>2a</b> in the active site of PO <sub>SPα</sub> ..... | 15 |
| Preparative-scale biotransformations with V3-P04 .....                                                       | 15 |
| Preparative-scale biotransformations with PO <sub>CLA</sub> .....                                            | 17 |
| Hydrogenation of <b>2d</b> .....                                                                             | 18 |
| Derivatisation for GC-analysis.....                                                                          | 19 |
| Calculation of green metrics.....                                                                            | 20 |
| Gene and protein sequences.....                                                                              | 23 |
| Analytical methods .....                                                                                     | 35 |
| Gas chromatography coupled with flame ionization detector.....                                               | 35 |
| Gas chromatography coupled with mass spectrometer .....                                                      | 36 |
| GC-chromatograms & MS-spectra .....                                                                          | 37 |
| <sup>1</sup> H- and <sup>13</sup> C-NMR.....                                                                 | 45 |
| Literature .....                                                                                             | 51 |

## Supplementary data

### Calculation of relative per-residue solvent accessible surface area

The relative per-residue solvent accessible surface area (SASA) was calculated for cysteine-, methionine- and tyrosine residues of PO<sub>SP $\alpha$</sub>  wt [Protein Data Bank (PDB): 3AWM] using PyMOL (version 2.5.4).

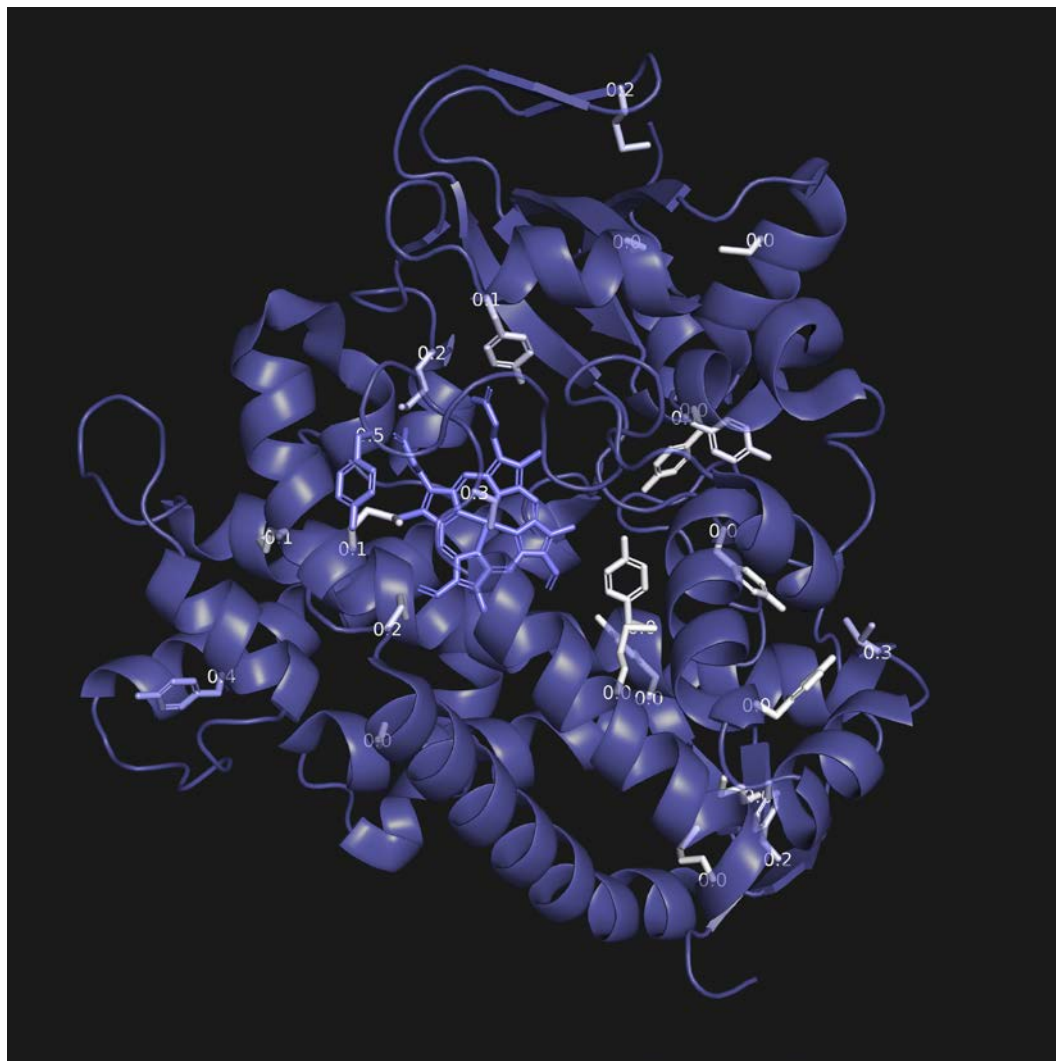

Figure S1: Relative per-residue solvent accessible surface area for cysteine-, methionine-, and tyrosine residues of PO<sub>SP $\alpha$</sub>  (PDB: 3AWM) calculated in PyMOL. Relative SASA values are displayed for each residue. Colour gradient indicates degree of solvent exposure (white = low SASA, blue = high SASA).

Table S1: Relative per-residue solvent accessible surface area for cysteine-, methionine-, and tyrosine residues of  $PO_{SP\alpha}$  (PDB: 3AWM) given as percentages and sorted from largest to smallest.

| Entry | Amino Acid | Position | SASA [%] |
|-------|------------|----------|----------|
| 01    | Tyr        | 356      | 46       |
| 02    | Tyr        | 214      | 36       |
| 03    | Cys        | 361      | 31       |
| 04    | Cys        | 260      | 25       |
| 05    | Met        | 69       | 23       |
| 06    | Tyr        | 384      | 18       |
| 07    | Met        | 102      | 16       |
| 08    | Met        | 304      | 16       |
| 09    | Tyr        | 58       | 14       |
| 10    | Tyr        | 317      | 13       |
| 11    | Met        | 97       | 10       |
| 12    | Met        | 99       | 8        |
| 13    | Tyr        | 285      | 5        |
| 14    | Cys        | 28       | 3        |
| 15    | Tyr        | 249      | 3        |
| 16    | Met        | 382      | 2        |
| 17    | Tyr        | 21       | 1        |
| 18    | Tyr        | 134      | 1        |
| 19    | Tyr        | 273      | 1        |
| 20    | Met        | 1        | 0        |
| 21    | Cys        | 47       | 0        |
| 22    | Cys        | 146      | 0        |
| 23    | Met        | 371      | 0        |
| 24    | Met        | 408      | 0        |

## Analytical-scale biotransformation of **1a** in batch

To compare the performance, the  $\alpha$ -hydroxylation of octanoic acid was investigated in batch for selected variants (Scheme S1). The wildtype enzyme as well as variants V3 and V3-P04 were tested (Table S2). Interestingly, while variant V3-P04 portrayed higher  $\text{H}_2\text{O}_2$  tolerance and outperformed the parent for biotransformations conducted under continuous oxidant addition, the variant yielded the lowest amounts of product in the batch setup at both 25- and 50 mM substrate loading. Furthermore, V3, which had shown the highest  $\text{H}_2\text{O}_2$  tolerance under the investigated conditions, only reached marginally higher product concentrations than the wildtype.

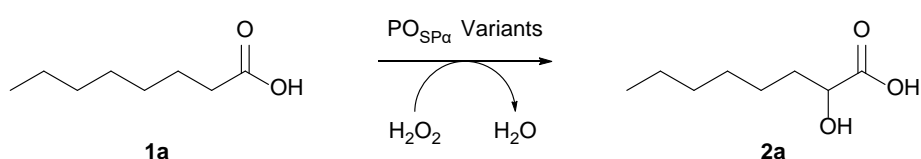

Scheme S1:  $\text{PO}_{\text{SP}\alpha}$ -catalyzed hydroxylation of octanoic acid **1a** to 2-hydroxyoctanoic acid **2a**.

Table S2: Product formation for the  $\text{PO}_{\text{SP}\alpha}$ -mediated hydroxylation of **1a** in batch.

| Batch setup       |         |                |        |                     |
|-------------------|---------|----------------|--------|---------------------|
| Substrate Loading | Variant | <b>2a</b> [mM] | ee [%] | wt-Productivity [%] |
| 25 mM             | wt      | 7.0            | 98 (S) | 100                 |
|                   | V3      | 7.2            | 98 (S) | 103                 |
|                   | V3-P04  | 5.6            | 97 (S) | 81                  |
| 50 mM             | wt      | 9.6            | 98 (S) | 100                 |
|                   | V3      | 9.8            | 98 (S) | 103                 |
|                   | V3-P04  | 7.7            | 97 (S) | 80                  |

Reaction conditions: 3  $\mu\text{M}$  peroxygenase, 25-50 mM **1a**, 1 eq  $\text{H}_2\text{O}_2$ , in KPi buffer [1 mL, 100 mM, pH 7.4, 5% (v/v) ethanol] inside 2 mL microcentrifuge tubes under shaking (400 rpm, 25  $^\circ\text{C}$ , 15 h). Biotransformations were prepared in duplicate.

## Supplementary methods

### Gene synthesis

All genes were obtained from commercial suppliers in the desired vectors and codon optimised for expression in *E. coli*. Genes for PO<sub>SP $\alpha$</sub>  (UniProtKB ID: O24782) and its variants were sub-cloned into pDB-HisGST vectors due to poor soluble expression. The gene for PO<sub>CLA</sub> (NCBI Reference Sequence: WP\_010966602.1) was subcloned into a pET28a(+) vector.

### Protein expression and purification

Overnight cultures were prepared in LB-medium (10 mL, 50  $\mu$ g/mL kanamycin) in 50 mL conical tubes using single colonies for inoculation. Inoculated cultures were incubated at 37 °C and 120 rpm overnight. Main cultures were prepared in LB-/TB-medium (660 mL, 50  $\mu$ g/mL kanamycin) in 2 L baffled cultivation flasks using overnight cultures (5 mL). Main cultures were incubated at 30-37 °C and 120 rpm until they reached an OD<sub>600</sub> of 0.6-0.8. Cultures were then cooled to 20 °C before addition of 5-aminolevulinic acid (0.5 mM, 500 mM stock). After incubating the cultures at 20 °C and 120 rpm for ten minutes, protein expression was induced by addition of isopropyl- $\beta$ -D-thiogalactopyranoside (IPTG, 0.4-1 mM final, 1 M stock). Induced cultures were incubated at 20 °C and 120 rpm overnight. Cells were harvested by centrifugation (8,000 rpm, 4 °C, 20 min), supernatant was discarded, and pellets were resuspended in KPi buffer (10 mL/g pellet, 100 mM, pH 7.4). Cells were transferred to 50 mL conical tubes and again centrifuged (4,500 rpm, 4 °C, 20 min). Pellets were stored at -20 °C.

For purification, pellets were resuspended in binding buffer I/II and incubated for two hours on ice. Cells were then disrupted by sonication (30% amplitude; pulse: 2 sec ON, 4 sec OFF; 2 min total; twice for each). Insoluble cell components were removed by centrifugation (18,000 rpm, 4 °C, 30 min) and supernatant was sterile filtered (0.45  $\mu$ m syringe filter). Protein purification was done using a HisTrap™ column (5 mL) connected to a peristaltic pump system. The column was washed with dH<sub>2</sub>O (5 column volumes) and then equilibrated with binding buffer I/II. After loading the sterile filtered lysate, unbound protein was removed with binding buffer I/II (8-10 column volumes). Then, bound protein was eluted using elution buffer I/II. Elution was clearly visible due to the protein's red colour. Any remaining protein on the column was removed with cleaning buffer [25 mL, 300 mM KCl, 100 mM KPi, 500 mM imidazole pH 7.5 (degassed)]. The column was then washed with dH<sub>2</sub>O (10 column volumes) and stored

in 20% (v/v) ethanol at 4 °C. Eluted protein was concentrated in VIVASPIN tubes (30,000 MWCO PES), desalted with PD-10 columns, and eluted in KPi buffer [100 mM, pH 7.4, 15% (v/v) glycerol]. Purified protein was shock-frozen in liquid nitrogen and stored at -20 °C. Protein expression was investigated by SDS-PAGE (Figures S2-S6) and CO difference spectroscopy.

Buffers for protein purification:

Binding buffer I: 100 mM KPi, 300 mM KCl, 50 mM imidazole, pH 7.5 (filtered and degassed)

Binding buffer II: 100 mM NaCl, 100 mM KPi, 40 mM imidazole, 0.8% w/v cholate, 1 mM PMSF, and 15% (v/v) glycerol, pH 7.5 (filtered and degassed)

Elution buffer I: 100 mM KPi, 300 mM KCl, 300 mM imidazole, pH 7.5 (filtered and degassed)

Elution buffer II: 100 mM NaCl, 100 mM KPi, 250 mM imidazole, 0.8% (w/v) cholate, and 15% (v/v) glycerol, pH 7.5 (filtered and degassed)

For PO<sub>SPα</sub> variants:

Main cultures were prepared in LB-medium and incubated at 37 °C. Protein production was induced with IPTG (1 mM final concentration). Protein purification was done using binding buffer II and elution buffer II.

For PO<sub>CLA</sub>:

Main cultures were prepared in TB-medium and incubated at 30 °C. Protein production was induced with IPTG (0.4 mM final concentration). Protein purification was done using binding buffer I and elution buffer I.

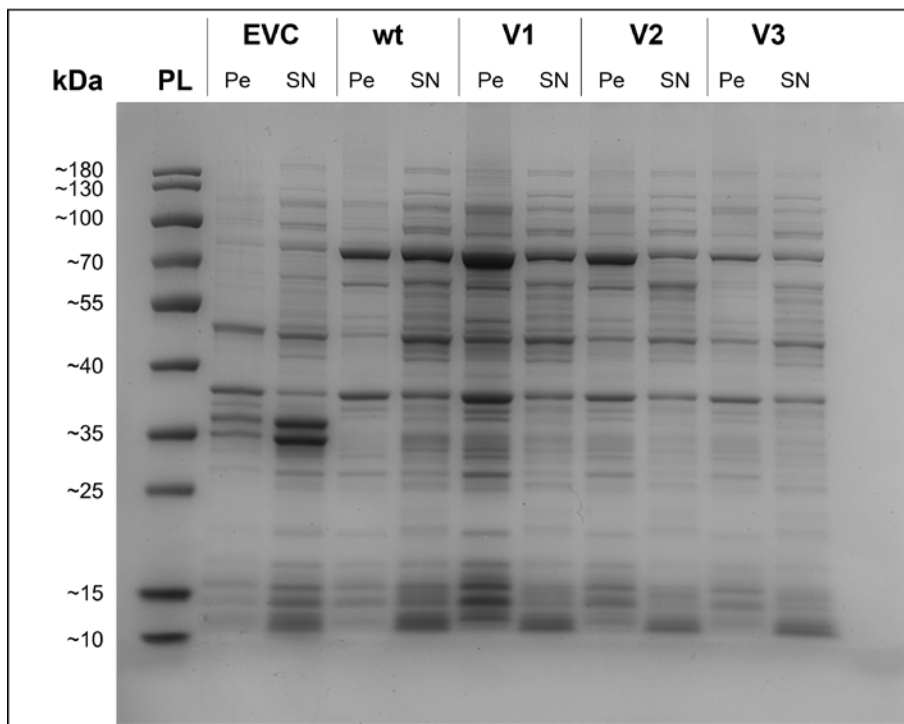

Figure S2: SDS-PAGE of  $PO_{SP\alpha}$  variants heterologously expressed in *E. coli* BL21(DE3). PL: PageRuler™ Prestained Protein Ladder, Pe: pellet, SN: supernatant. EVC: Empty vector control (pDB-HisGST).  $PO_{SP\alpha}$  variants: ~72.5 kDa.

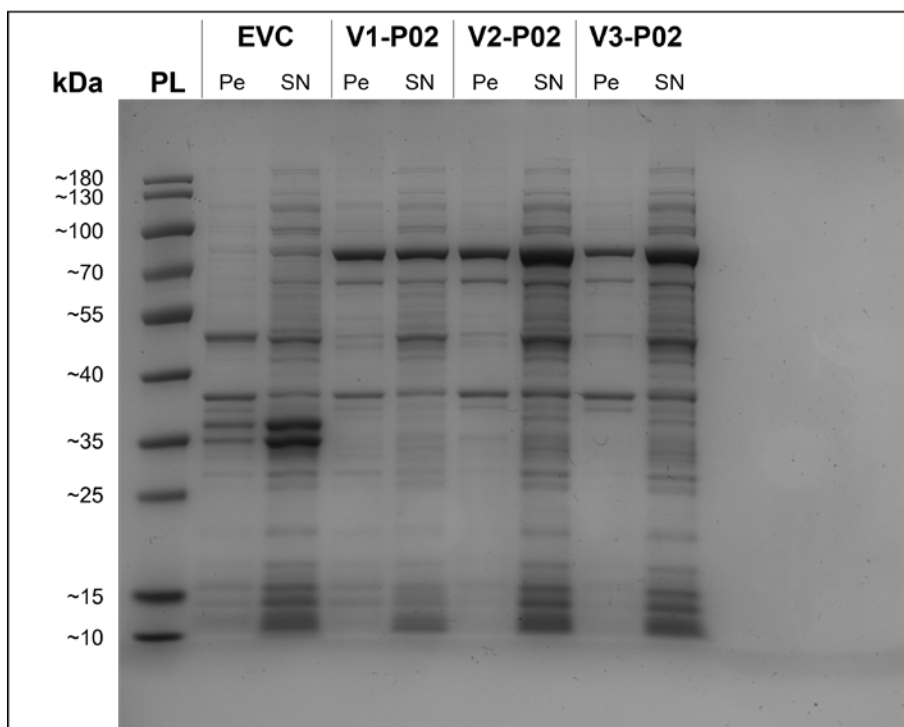

Figure S3: SDS-PAGE of  $PO_{SP\alpha}$  variants heterologously expressed in *E. coli* BL21(DE3). PL: PageRuler™ Prestained Protein Ladder, Pe: pellet, SN: supernatant. EVC: Empty vector control (pDB-HisGST).  $PO_{SP\alpha}$  variants: ~72.5 kDa.

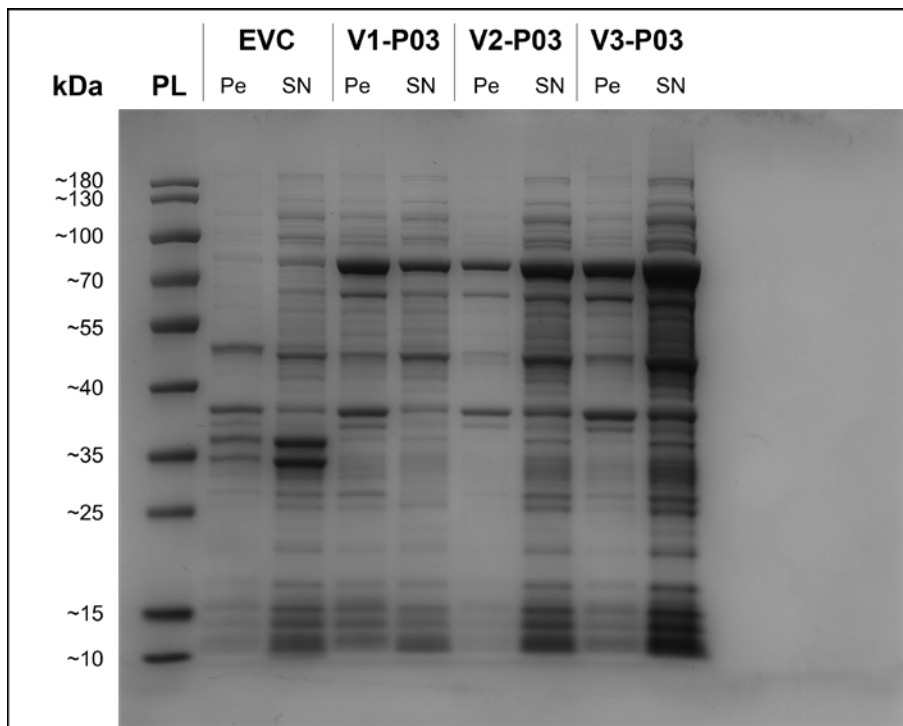

Figure S4: SDS-PAGE of  $PO_{SP\alpha}$  variants heterologously expressed in *E. coli* BL21(DE3). PL: PageRuler™ Prestained Protein Ladder, Pe: pellet, SN: supernatant. EVC: Empty vector control (pDB-HisGST).  $PO_{SP\alpha}$  variants: ~72.5 kDa.

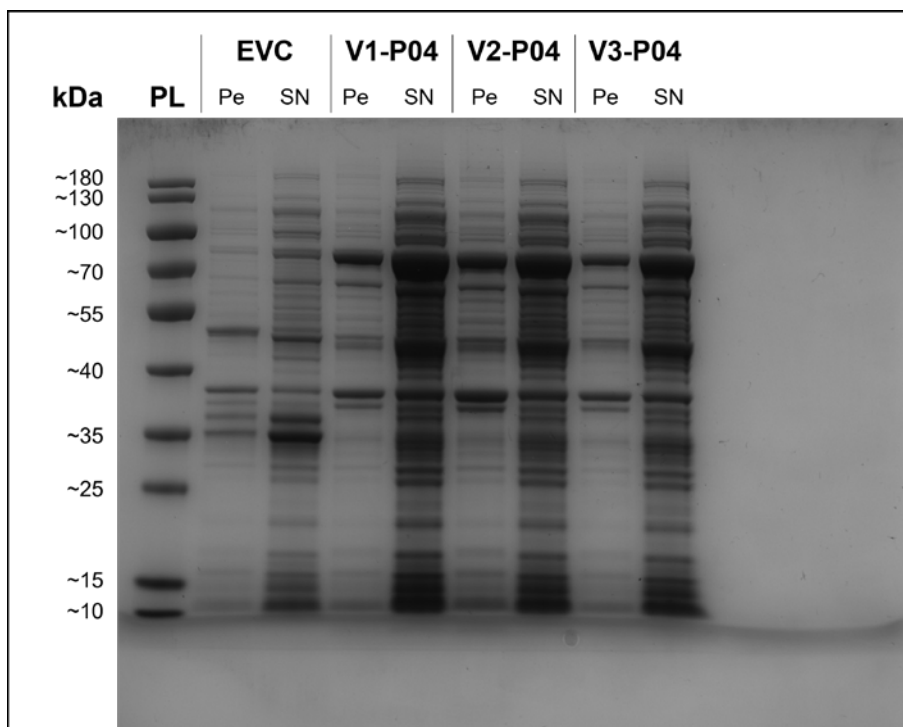

Figure S5: SDS-PAGE of  $PO_{SP\alpha}$  variants heterologously expressed in *E. coli* BL21(DE3). PL: PageRuler™ Prestained Protein Ladder, Pe: pellet, SN: supernatant. EVC: Empty vector control (pDB-HisGST).  $PO_{SP\alpha}$  variants: ~72.5 kDa.

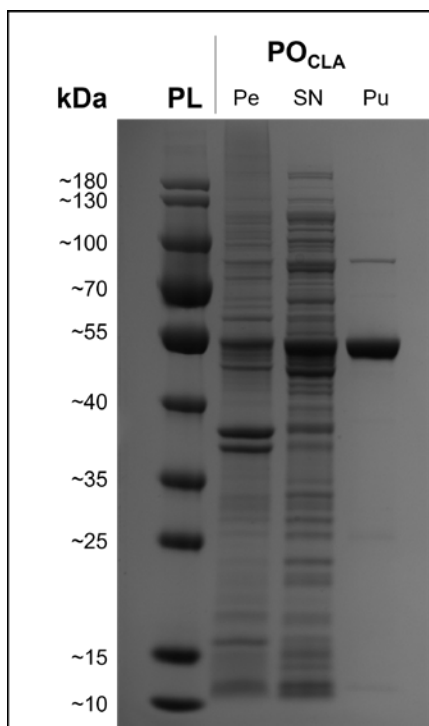

Figure S6: SDS-PAGE of  $PO_{CLA}$  heterologously expressed in *E. coli* BL21(DE3). PL: PageRuler™ Prestained Protein Ladder, Pe: pellet, SN: supernatant, Pu: purified fraction (affinity chromatography).  $PO_{CLA}$ : ~48.2 kDa.

### CO-spectral assay (difference spectroscopy)

CYP concentration was determined by measuring the absorbance of ferrous CO-complexes according to the protocol by Guengerich *et al.*<sup>1</sup>

CYP solutions were prepared in KPi buffer [2 mL, 100 mM, pH 7.4, 15% (v/v) glycerol] at concentrations  $\leq 5 \mu\text{M}$  to remain within the linear range of the assay. Samples were divided equally to two separate polystyrene cuvettes (10 x 4 x 45 mm), one of which was subsequently saturated with carbon monoxide by bubbling for approximately 60 seconds. Reference sample and CO-saturated sample were then reduced by addition of a spatula tip of sodium dithionite ( $\text{Na}_2\text{S}_2\text{O}_4$ ) leading to the ferrous form of the iron complex. Absorbance spectra of both samples were recorded every 60 seconds over a range of 400-540 nm using a Cary 60 UV-Vis spectrophotometer (Agilent Technologies) until the absorbance maximum at ~450 nm of the CO-saturated ferrous species no longer increased. CYP concentration was determined from the absorbance difference (Figure S7) according to Equation S1.

Equation S1: Determination of CYP concentration using the CO-spectral assay.

$$\frac{(A_{450}-A_{490})_{saturated} - (A_{450}-A_{490})_{reference}}{0.091} = \mu\text{mol CYP per L}$$

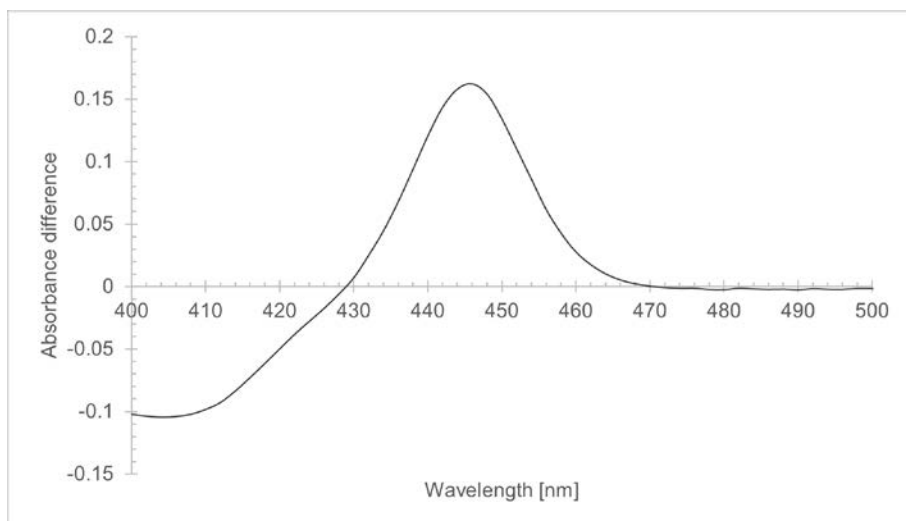

Figure S7: Exemplary difference-spectrum of the CO-saturated ferrous species (saturated) versus ferrous species (reference) of  $PO_{SP\alpha}$  wt.

### $H_2O_2$ -Mediated enzyme inactivation studies

For investigating the  $H_2O_2$ -tolerance of  $PO_{SP\alpha}$  variants, peroxygenases were incubated for two hours with 20 mM  $H_2O_2$  in potassium phosphate buffer [100 mM, pH 7.4, 15% (v/v) glycerol]. Peroxygenase stocks were thawed and diluted with KPi buffer [100 mM, pH 7.4, 15% (v/v) glycerol] to obtain solutions of 4  $\mu$ M enzyme (3.5 mL). In addition, a  $H_2O_2$  stock solution (40 mM) was prepared in KPi buffer [100 mM, pH 7.4, 15% (v/v) glycerol]. Enzyme solutions (4  $\mu$ M, 500  $\mu$ L) were mixed with the  $H_2O_2$  stock solution (500  $\mu$ L) inside 2 mL microcentrifuge tubes to obtain samples with final concentrations of 2  $\mu$ M enzyme and 20 mM  $H_2O_2$ . Additionally, reference samples were prepared in KPi buffer without hydrogen peroxide. Samples were incubated for two hours (25 °C, 400 rpm) before remaining  $H_2O_2$  was removed by addition of an aqueous catalase solution [50  $\mu$ L, 2 mg/mL catalase ( $\geq 10,000$  U/mg, bovine liver, Sigma-Aldrich, C40), 100 mM KPi, pH 7.4]. Samples were put on ice and haem-bound P450 concentration was determined by CO-spectral assay.

### Determination of specific activity

To determine specific activities of  $PO_{SP\alpha}$ -variants for the  $\alpha$ -hydroxylation of **1a**, biotransformations were conducted at analytical scale in 2 mL microcentrifuge tubes. Purified enzyme was thawed, desalted using a PD-10 column, then eluted in KPi buffer (100 mM, pH 7.4) to obtain enzyme solutions with the desired concentration (0.4  $\mu$ M). In addition, a stock of **1a** (1 M) was prepared in ethanol and a  $H_2O_2$  stock (20 mM) was prepared in KPi buffer (100 mM, pH 7.4).  $H_2O_2$  stock (250  $\mu$ L), KPi buffer (200  $\mu$ L, 100

mM, pH 7.4), **1a** stock (50  $\mu$ L), and finally enzyme stock (500  $\mu$ L) were transferred to 2 mL microcentrifuge tubes leading to biotransformation samples with final concentrations of 0.2  $\mu$ M enzyme, 50 mM **1a**, and 5 mM H<sub>2</sub>O<sub>2</sub> in KPi buffer [1 mL, 100 mM, pH 7.4, 5% (v/v) ethanol]. Exact enzyme concentrations were afterwards determined using the CO-spectral assay. Biotransformations were shaken for precisely 20 minutes (25 °C, 400 rpm) before reactions were quenched by the addition of an aqueous HCl solution (5 M, 100  $\mu$ L). Samples were extracted with ethyl acetate (2 x 500  $\mu$ L, 5 mM dodecanoic acid).

Specific enzyme activities were calculated based on Equation S2 using the amount of formed product (**2a**).

*Equation S2: Determination of the specific activity of PO<sub>SP $\alpha$</sub> -variants for the hydroxylation of octanoic acid. Amount of formed product was used instead of the amount of consumed substrate. Enzyme amounts were calculated based on CO-spectral assay data using the molecular weight with GST-tag (72,490 Da).*

$$\text{Specific Activity} \left[ \frac{U}{mg} \right] = \frac{\text{Product} [\mu M]}{\text{Enzyme} \left[ \frac{mg}{mL} \right] * 20 \text{ min}}$$

Scoring of PO<sub>SP $\alpha$</sub>  variants (performance scores)

To deduce the overall best-performing catalyst from all the collected data, partial scores ( $s_p$ ) were assigned for each of the four investigated parameters (H<sub>2</sub>O<sub>2</sub>-stability, expression yield, specific activity for oxidation of **1a**, stereoselectivity for formation of **2a**) according to Equation S3. By choosing a relative scale where  $m_p$  and  $M_p$  are the respective minimum- and maximum values of each category, each partial score was mapped into a range of  $s_p \in [0, 1]$  and therefore all parameters were weighted equally. The overall score (performance score,  $s$ ) was defined as the sum of all partial scores (Equation S3, **b.**). The respective partial scores and overall scores of each PO<sub>SP $\alpha$</sub>  variant are given in Table S3.

*Equation S3: a. Determination of partial scores ( $s_p$ ) assigned to PO<sub>SP $\alpha$</sub>  variants for each of the four experimental parameters.  $x_p$  = experimental value,  $m_p$  =  $\min\{x_p\}$ ;  $M_p$  =  $\max\{x_p\}$ . b. Determination of overall scores (performance scores,  $s$ ) based on partial scores.*

$$\mathbf{a.} \quad s_p = \frac{x_p - m_p}{M_p - m_p} \qquad \mathbf{b.} \quad s = \sum_p s_p$$

Table S3: Partial scores ( $s_p$ ) and performance scores ( $s$ ) of all investigated  $PO_{SP\alpha}$  variants.

| Variant       | Partial scores ( $s_p$ )                 |                  |                |                    | Performance Score ( $s$ ) |
|---------------|------------------------------------------|------------------|----------------|--------------------|---------------------------|
|               | H <sub>2</sub> O <sub>2</sub> -Stability | Expression Yield | Spec. Activity | Stereo-selectivity |                           |
| <b>V3-P04</b> | 0.65                                     | 0.64             | 1.00           | 0.56               | <b>2.85</b>               |
| <b>V1</b>     | 0.76                                     | 0.45             | 0.53           | 0.85               | <b>2.59</b>               |
| <b>V3-P03</b> | 0.50                                     | 0.45             | 0.79           | 0.69               | <b>2.43</b>               |
| <b>V3-P02</b> | 0.39                                     | 0.75             | 0.78           | 0.45               | <b>2.38</b>               |
| <b>V2-P03</b> | 0.23                                     | 0.85             | 0.27           | 0.97               | <b>2.32</b>               |
| <b>V1-P04</b> | 0.18                                     | 1.00             | 0.42           | 0.68               | <b>2.27</b>               |
| <b>V2-P04</b> | 0.41                                     | 0.83             | 0.26           | 0.61               | <b>2.11</b>               |
| <b>wt</b>     | 0.12                                     | 0.46             | 0.41           | 1.00               | <b>1.99</b>               |
| <b>V1-P02</b> | 0.48                                     | 0.76             | 0.43           | 0.30               | <b>1.96</b>               |
| <b>V3</b>     | 1.00                                     | 0.00             | 0.43           | 0.41               | <b>1.84</b>               |
| <b>V1-P03</b> | 0.73                                     | 0.58             | 0.20           | 0.23               | <b>1.74</b>               |
| <b>V2</b>     | 0.77                                     | 0.05             | 0.12           | 0.35               | <b>1.31</b>               |
| <b>V2-P02</b> | 0.00                                     | 0.61             | 0.00           | 0.00               | <b>0.61</b>               |

#### Analytical-scale biotransformations conducted in fed-batch

Biotransformations were prepared in KPi buffer [100 mM, pH 7.4, 5% (v/v) ethanol] inside glass GC-vials (1.5 mL). Purified enzyme was thawed, desalted using a PD-10 column, then eluted in KPi buffer (3.5 mL, 100 mM, pH 7.4) to obtain enzyme solutions with the desired concentrations (6  $\mu$ M). Substrate stocks (100-200 mM) were prepared in KPi buffer [100 mM, pH 7.4, 10% (v/v) ethanol]. Enzyme stocks (6  $\mu$ M, 500  $\mu$ L) were then transferred to glass GC-vials with substrate stocks (500  $\mu$ L) leading to final concentrations of 3  $\mu$ M enzyme and 50-100 mM substrate in KPi buffer [1 mL, 100 mM, pH 7.4, 5% (v/v) ethanol]. Samples were shaken overnight (15 h, 400 rpm, RT) while an H<sub>2</sub>O<sub>2</sub> solution (300-400 mM, 100 mM KPi, pH 7.4) was continuously added (21-31  $\mu$ L/h) over 12 hours *via* a syringe pump leading to the addition of 1.5 equivalents of H<sub>2</sub>O<sub>2</sub>. Afterwards, reactions were quenched by addition of an aqueous HCl solution (150  $\mu$ L, 5 M) and the product was extracted with ethyl acetate (2 x 500  $\mu$ L, 100 mM dodecanoic acid). The total volume of 1 mL of ethyl acetate implies that the obtained analyte concentrations correspond to the one at the start of the reaction.

50 mM substrate loading: 100 mM stock, 300 mM H<sub>2</sub>O<sub>2</sub> solution, 21  $\mu$ L/h feeding rate, 252  $\mu$ L of total volume.

75 mM substrate loading: 150 mM stock, 300 mM H<sub>2</sub>O<sub>2</sub> solution, 31  $\mu$ L/h feeding rate, 372  $\mu$ L of total volume.

100 mM substrate loading: 200 mM stock, 400 mM H<sub>2</sub>O<sub>2</sub> solution, 31  $\mu$ L/h feeding rate, 372  $\mu$ L of total volume.

#### Analytical-scale biotransformations conducted in batch

Biotransformations were prepared in KPi buffer [100 mM, pH 7.4, 5% (v/v) ethanol] in microcentrifuge tubes (2 mL). Purified enzyme was thawed, desalted using a PD-10 column, then eluted in KPi buffer (3.5 mL, 100 mM, pH 7.4) to obtain enzyme solutions with the desired concentrations (3.53  $\mu$ M). In addition, substrate stocks (250-500 mM) were prepared in a KPi buffer (100 mM, pH 7.4)/ethanol mixture (1:1) and hydrogen peroxide stocks (0.5-1 M) were prepared in KPi buffer (100 mM, pH 7.4). Enzyme stocks (850  $\mu$ L) were then transferred to 2 mL microcentrifuge tubes with substrate stocks (100  $\mu$ L) and H<sub>2</sub>O<sub>2</sub>-stocks (50  $\mu$ L) leading to final concentrations of 3  $\mu$ M enzyme, 25-50 mM substrate, and 25-50 mM H<sub>2</sub>O<sub>2</sub> (1 eq) in KPi buffer [1 mL, 100 mM, pH 7.4, 5% (v/v) ethanol]. Samples were shaken overnight inside a tilted (90°) benchtop shaker (15 h, 400 rpm, 25 °C). Afterwards, reactions were quenched by the addition of an aqueous HCl solution (100  $\mu$ L, 5 M) and the product was extracted with ethyl acetate (2 x 500  $\mu$ L, 100 mM dodecanoic acid).

#### Analytical-scale biotransformations for the over-oxidation of **2a**

Biotransformations were prepared in KPi buffer [100 mM, pH 7.4, 5% (v/v) ethanol] inside glass GC vials (1.5 mL). Purified enzyme was thawed, desalted using a PD-10 column, then eluted in KPi buffer (3.5 mL, 100 mM, pH 7.4) to obtain enzyme solutions with the desired concentrations (3.16  $\mu$ M). A stock of *rac*-**2a** (200 mM) was prepared in ethanol. Enzyme stocks (3.16  $\mu$ M, 950  $\mu$ L) were then transferred to glass GC vials with substrate stocks (50  $\mu$ L) leading to final concentrations of 3  $\mu$ M enzyme and 10 mM **2a** in KPi buffer [1 mL, 100 mM, pH 7.4, 5% (v/v) ethanol]. Samples were shaken at 400 rpm and room temperature overnight (15 h) while an H<sub>2</sub>O<sub>2</sub> solution (133 mM, 100 mM KPi, pH 7.4) was continuously added (12.5  $\mu$ L/h) over 12 hours *via* a syringe pump leading to 1.5 equivalents of H<sub>2</sub>O<sub>2</sub>. Afterwards, reactions were

quenched by the addition of an aqueous HCl solution (100  $\mu$ L, 5 mM) and the product was extracted with ethyl acetate (2 x 500  $\mu$ L, 10 mM dodecanoic acid).

#### Molecular docking of (S)- and (R)-**2a** in the active site of PO<sub>SP $\alpha$</sub>

Molecular docking of (S)- and (R)-**2a** in the active site of PO<sub>SP $\alpha$</sub>  was performed in Maestro using rigid receptor docking with Glide.<sup>2</sup> Ligands were prepared in Maestro with LigPrep using the OPLS4 force field and a target pH of 7.00 +/- 2.00 for ionisation. The crystal structure of PO<sub>SP $\alpha$</sub>  (pdb: 3AWM) was used as receptor and the protein preparation was performed with Maestro using chain A and substructures HEM 501, HEM 501 Fe, and HOH 481. Missing loops were filled in using Prime. The bond length between HEM 501 Fe and HOH 481 was adjusted to 1.66 Å, bond order was set to 0, and the charge of the oxygen of HOH 481 was adjusted to -2 to simulate a reactive Fe(IV) oxo species.<sup>3</sup> The receptor grid was centred around HEM 501, HEM 501 Fe, and ARG 241 with a grid length of 15 Å. Rigid receptor docking was performed in Maestro, generating ten poses for each of the two ligands.

#### Preparative-scale biotransformations with V3-P04

Preparative-scale biotransformations were prepared in KPi buffer (20 mL, total volume) inside round-bottom flasks (100 mL). Purified enzyme (PO<sub>SP $\alpha$</sub>  variant V3-P04) was thawed, desalted using a PD-10 column, then eluted in KPi buffer (3.5 mL, 100 mM, pH 7.4) to obtain enzyme amounts needed to reach the desired final concentration (3  $\mu$ M). Meanwhile, substrate stock solutions were prepared in ethanol [1 mL, 1-3 M (**1a-d**)] and transferred to a round-bottom flask containing KPi buffer (15.5 mL, 100 mM, pH 7.4). An aqueous NaOH solution (10 M) was then used to readjust the pH of the reaction mixture to 7.4. Finally, the prepared enzyme solution was added to the round-bottom flask under stirring (400 rpm) leading to final concentrations of 3  $\mu$ M of PO<sub>SP $\alpha$</sub>  PROSS4-Q and 50-150 mM of substrate (**1a**: 150 mM, **1b**: 50 mM, **1c**: 100 mM, **1d**: 75 mM). The reaction was stirred overnight (15 h) while continuously adding H<sub>2</sub>O<sub>2</sub> via a syringe pump [250-600 mM (**1a**: 600 mM, **1b**: 250 mM, **1c**: 500 mM, **1d**: 375 mM), in KPi buffer (100 mM, pH 7.4), 500  $\mu$ L/h, 12 h, 6 mL total volume, 1.5 eq (1.2 eq for **1a**)]. To observe the reaction progress, samples (500  $\mu$ L) were taken after 2, 4, 6, 8, and 12 h (for **1a**); as well as immediately before the reaction work up. These samples were extracted with ethyl acetate (2 x 250  $\mu$ L, 100 mM dodecanoic acid), organic phases were dried with Na<sub>2</sub>SO<sub>4</sub> and 100  $\mu$ L were mixed with BSTFA-TMCS (100  $\mu$ L) and pyridine (100  $\mu$ L) for derivatization. Samples were then shaken for two hours (700

rpm, 25 °C) before being analyzed by GC-FID. As the reaction volume increased over time due to H<sub>2</sub>O<sub>2</sub>-feeding and samples were taken throughout the reaction, overall analyte concentrations decreased over time. However, as all analytes were quantified by linear calibration with authentic standards, concentrations were corrected based on the total analyte recovery of each sample.

Afterwards, reactions were acidified (pH 3.0) with an aqueous HCl solution (36%) leading to precipitation of product and catalyst. Ethyl acetate (20 mL) was added, and the resulting suspensions were filtered through a bed of celite to remove precipitated protein. Formed product was extracted with ethyl acetate (3x 20 mL) using a separating funnel, combined organic phases were dried with Na<sub>2</sub>SO<sub>4</sub>, and solvent was removed under reduced pressure. Conversion was checked by GC-MS and when necessary, product was purified *via* flash column chromatography. Product formation was confirmed by NMR.

## 2a

Yield: 385 mg (2.4 mmol, 80%) white solid

94% ee (S)

<sup>1</sup>H NMR (300 MHz, CDCl<sub>3</sub>): δ = 4.30 (dd, *J* = 7.5, 4.2 Hz, 1H), 1.97 – 1.81 (m, 1H), 1.81 – 1.61 (m, 1H), 1.54 – 1.25 (m, 8H), 0.89 (t, 3H).

<sup>13</sup>C NMR (75 MHz, CDCl<sub>3</sub>): δ = 180.1, 70.3, 34.2, 31.6, 28.9, 24.7, 22.6, 14.1.

## 2b

Yield: 36 mg (0.25 mmol, 25%) slightly yellow solid

89% ee (S), [α]<sub>D</sub><sup>20</sup> = +3.24° [c = 1.7, CHCl<sub>3</sub>]

<sup>1</sup>H NMR (300 MHz, CDCl<sub>3</sub>): δ = 4.30 (dd, *J* = 7.7, 4.0 Hz, 1H), 1.95 – 1.79 (m, 1H), 1.79 – 1.63 (m, 1H), 1.56 – 1.41 (m, 2H), 1.40 – 1.24 (m, 4H), 0.97 – 0.86 (m, 3H).

<sup>13</sup>C NMR (75 MHz, CDCl<sub>3</sub>): δ = 180.0, 70.3, 34.1, 31.4, 24.4, 22.5, 14.0.

## 2c

Yield: 302 mg (1.7 mmol, 87%) white solid

95% ee (S),  $[\alpha]_{\text{D}}^{25} = +4.32^{\circ}$  [c = 3.15, CHCl<sub>3</sub>]

<sup>1</sup>H NMR (300 MHz, CDCl<sub>3</sub>):  $\delta = 4.30$  (dd,  $J = 7.5, 4.2$  Hz, 1H), 1.96 – 1.80 (m, 1H), 1.80 – 1.63 (m, 1H), 1.56 – 1.41 (m, 2H), 1.41 – 1.25 (m, 8H), 0.95 – 0.85 (m, 3H).

<sup>13</sup>C NMR (75 MHz, CDCl<sub>3</sub>):  $\delta = 180.1, 70.3, 34.2, 31.8, 29.2, 29.1, 24.8, 22.6, 14.1$ .

## 2d

Yield: 253 mg (1.4 mmol, 91%) white solid

94% ee (S),  $[\alpha]_{\text{D}}^{20} = +4.50^{\circ}$  [c = 1.00, CHCl<sub>3</sub>]

<sup>1</sup>H NMR (300 MHz, CDCl<sub>3</sub>):  $\delta = 5.83$  (ddt,  $J = 16.9, 10.1, 6.7$  Hz, 1H), 5.08 – 4.90 (m, 2H), 4.30 (dd,  $J = 7.6, 4.1$  Hz, 1H), 2.15 – 1.98 (m, 2H), 1.96 – 1.61 (m, 2H), 1.60 – 1.25 (m, 8H).

<sup>13</sup>C NMR (75 MHz, CDCl<sub>3</sub>):  $\delta = 180.0, 139.0, 114.3, 70.3, 34.2, 33.7, 29.1, 28.9, 28.8, 24.7$ .

### Preparative-scale biotransformations with PO<sub>CLA</sub>

As authentic standards for racemic **2c-d** were not commercially available, preparative-scale biotransformations of **1c-d** were conducted with PO<sub>CLA</sub> to obtain the desired  $\alpha$ -hydroxy acids. PO<sub>CLA</sub> was chosen as catalyst due to its low stereoselectivity, enabling the synthesis of both enantiomers of **2b-d**, which was important for establishing chiral analytics.

Preparative-scale biotransformations were prepared in KPi buffer (20 mL, total volume) inside round-bottom flasks (100 mL). Purified enzyme (PO<sub>CLA</sub>) was thawed, desalted using a PD-10 column, then eluted in KPi buffer (3.5 mL, 100 mM, pH 7.4) to obtain enzyme amounts needed to reach the desired final concentration (6  $\mu$ M). Meanwhile, substrate stock solutions were prepared in ethanol [1 mL, 400 mM (**1b-d**)] and transferred to a round-bottom flask containing KPi buffer (15.5 mL, 100 mM, pH 7.4). An aqueous NaOH solution (10 M) was then used to readjust the pH of the reaction mixture to 7.4. Finally, the prepared enzyme solution was added to the round-bottom flask under stirring (400 rpm) leading to final concentrations of 6  $\mu$ M PO<sub>CLA</sub> and 20 mM

substrate. The reaction was stirred overnight (15 h) while continuously adding H<sub>2</sub>O<sub>2</sub> via a syringe pump [400 mM, in KPi buffer (100 mM, pH 7.4), 167  $\mu$ L/h, 12 h, 2 eq].

Afterwards, reactions were acidified (pH 3.0) with an aqueous HCl solution (36%) leading to precipitation of product and catalyst. Ethyl acetate (20 mL) was added, and the resulting suspensions were filtered through a bed of celite to remove precipitated protein. Formed product was extracted with ethyl acetate (3x 20 mL) using a separating funnel, combined organic phases were dried with Na<sub>2</sub>SO<sub>4</sub>, and solvent was removed under reduced pressure. Conversion was checked by GC-MS and when necessary, product was purified *via* flash column chromatography. Product formation was confirmed by NMR.

## **2b**

Yield: 57 mg (0.39 mmol, 98%) slightly yellow solid

<sup>1</sup>H NMR (300 MHz, CDCl<sub>3</sub>):  $\delta$  = 4.30 (dd,  $J$  = 7.5, 4.2 Hz, 1H), 1.96 – 1.61 (m, 2H), 1.58 – 1.24 (m, 6H), 1.01 – 0.86 (m, 3H).

<sup>13</sup>C NMR (75 MHz, CDCl<sub>3</sub>):  $\delta$  = 180.0, 70.3, 34.1, 31.4, 24.4, 22.5, 14.0.

## **2c**

Yield: 52 mg (0.3 mmol, 75%) white solid

<sup>1</sup>H NMR (300 MHz, CDCl<sub>3</sub>):  $\delta$  = 4.30 (dd,  $J$  = 7.5, 4.2 Hz, 1H), 1.96 – 1.62 (m, 2H), 1.57 – 1.21 (m, 10H), 0.95 – 0.85 (m, 3H).

<sup>13</sup>C NMR (75 MHz, CDCl<sub>3</sub>):  $\delta$  = 180.0, 70.3, 34.2, 31.8, 29.2, 29.1, 24.7, 22.6, 14.1.

## **2d**

Yield: 33 mg (0.18 mmol, 44%) slightly yellow solid

Crude directly employed for the hydrogenation with Pd/C

### Hydrogenation of **2d**

Pd/C (3 mg, 2.8  $\mu$ mol) was added to an oven-dried two-necked round-bottom flask (10 mL) with a stirring bar. The flask was equipped with a septum and a two-way valve. **2d** (30 mg, 161  $\mu$ mol) was dissolved in dry ethanol (4 mL) and transferred to the flask. The system was flushed with argon (5 minutes) and afterwards hydrogen was added under vigorous stirring using a balloon for increased pressure. The reaction was stirred

overnight at room temperature (21 °C). The hydrogen balloon had to be refilled several times to maintain a high-pressure environment. The following day, conversion was checked by TLC (cyclohexane/ethyl acetate/acetic acid, 25:25:1) and the system was again flushed with argon (10 minutes) to remove remaining hydrogen. The reaction mixture was then filtered through a bed of celite. The filtration residue was washed with ethanol (10 mL). Solvent was removed under reduced pressure.

Crude product: 27 mg (145  $\mu$ mol, 90%) white solid

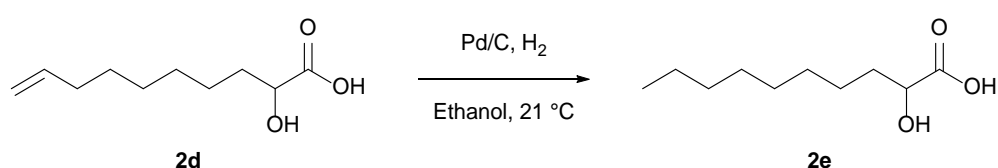

*Scheme S2: Reaction scheme for the hydrogenation of 2-hydroxy-9-decenoic acid (2d) to 2-hydroxydecanoic acid (2e).*

### Derivatisation for GC-analysis

For GC-MS analysis and quantitative analysis on GC-FID, analytes were derivatised with BSTFA-TMCS. After extraction with ethyl acetate, combined organic phases were dried with Na<sub>2</sub>SO<sub>4</sub> and 100  $\mu$ L were mixed with BSTFA-TMCS (100  $\mu$ L) and pyridine (100  $\mu$ L) for derivatisation. These samples were shaken for two hours (25 °C, 700 rpm) before being analysed by GC-FID (method GC-01). Analyte concentrations were determined by linear calibration using either commercial reference material (for **1a-d** and **2a**) or authenticated isolated material (for **2b-d**).

For chromatographic separation of hydroxy fatty acids on a chiral phase, analytes were derivatised with MeOH/ethyl chloroformate. After extraction with ethyl acetate, solvent of combined organic phases was removed under air flow and samples were resuspended in methanol [700  $\mu$ L, 5% (w/v) DMAP]. Ethyl chloroformate (150  $\mu$ L) was added to the samples which were then shaken for one hour (50 °C, 700 rpm). Solvent was removed under reduced pressure (GeneVac EZ-2 plus) and samples were resuspended in an aqueous HCl solution (0.2%, 700  $\mu$ L). Product was extracted with ethyl acetate (2 x 500  $\mu$ L), organic phases were combined and dried with Na<sub>2</sub>SO<sub>4</sub>. Samples were analysed by GC-FID (method GC-02).

## Calculation of green metrics

For a more meaningful comparison of the synthetic approaches for the preparation of  $\alpha$ -hydroxy acids discussed within this work, green chemistry metrics were determined. The E-Factor (Environmental Factor), which provides information on the amount of waste produced in a process, and the Atom Economy, describing the relative mass of reactants of a given reaction that are incorporated in the final product, were chosen for this purpose.

### E-Factor calculations:

While for E-Factor calculations the entire process should in general be considered up to the isolation of the desired final product, this was unfortunately not feasible as often no quantifiable amounts were provided in literature for the work up- and/or purification steps of the respective processes. Consequently, exclusively components used in the actual reactions (including solvents and buffer salts) were considered for the E-factor calculations (Table S4). Furthermore, only the reactions yielding the highest amounts of  $\alpha$ -hydroxylated carboxylic acid product were considered for this comparison (reaction schemes are shown in Scheme S3). E-Factors were calculated according to Equation S4 where all material that is not incorporated into the desired product is defined as waste.

*Equation S4: E-Factor calculation based on the amounts of components in the reaction and the amount of final product obtained.*

$$E \text{ Factor} = \frac{m(\text{waste})}{m(\text{desired product})} = \frac{\sum m(\text{reaction components}) - m(\text{desired product})}{m(\text{desired product})}$$

TableS4: Amounts of reaction components, amount of product, and calculated E-factors for the  $\alpha$ -hydroxylation approaches discussed within this work.

| Entry | Article                     | Reaction components                                                                                                                                                               | Product [g] | E-Factor |
|-------|-----------------------------|-----------------------------------------------------------------------------------------------------------------------------------------------------------------------------------|-------------|----------|
| 01    | Current work                | Water (26 g)<br>Ethanol (0.789 g)<br>K <sub>2</sub> HPO <sub>4</sub> /KH <sub>2</sub> PO <sub>4</sub> (0.433 g)<br>Substrate (0.433 g)<br>H <sub>2</sub> O <sub>2</sub> (0.122 g) | 0.385       | 71.1     |
| 02    | Muralidharan et al.<br>1984 | THF (2.67 g)<br>LDA (0.268 g)<br>HMPA (0.205 g)<br>Substrate (0.028 g)                                                                                                            | 0.015       | 210.4    |
| 03    | Dinca et al.<br>2012        | THF (17.8 g)<br><i>n</i> -BuLi (1.6 M in hexane,<br>1.818 g)<br>[Fc]PF <sub>6</sub> (0.99 g)<br>LiCl (0.4 g)<br>TEMPO (0.374)<br>Diethylamine (0.321 g)<br>Substrate (0.26 g)     | 0.291       | 74.5     |
| 04    | Tanaka et al.<br>2020       | THF (17.8 g)<br>Molecular sieve (4 Å, 2 g)<br>TEMPO (1.31 g)<br>Substrate (0.601 g)<br>Ligand L5 (0.011 g)<br>Fe(OAc) <sub>2</sub> (0.007 g)                                      | 1.19        | 17.3     |
| 05    | Bertolini et al.<br>2021    | Water (200 g)<br>Substrate (9.957 g)<br>KOH (7.85 g)<br>TCCA (3.78 g)<br>PCl <sub>3</sub> (0.165 g)                                                                               | 7.151       | 30.0     |

## Atom Economy calculations:

Atom Economies for each of the discussed reactions were calculated based on the total mass of reactants and the mass of the final product according to Equation S5.

Equation S5: Atom economy calculation based on the product mass and the total mass of reactants.

$$\text{Atom Economy} = \frac{m(\text{desired product})}{m(\text{reactants})} * 100$$

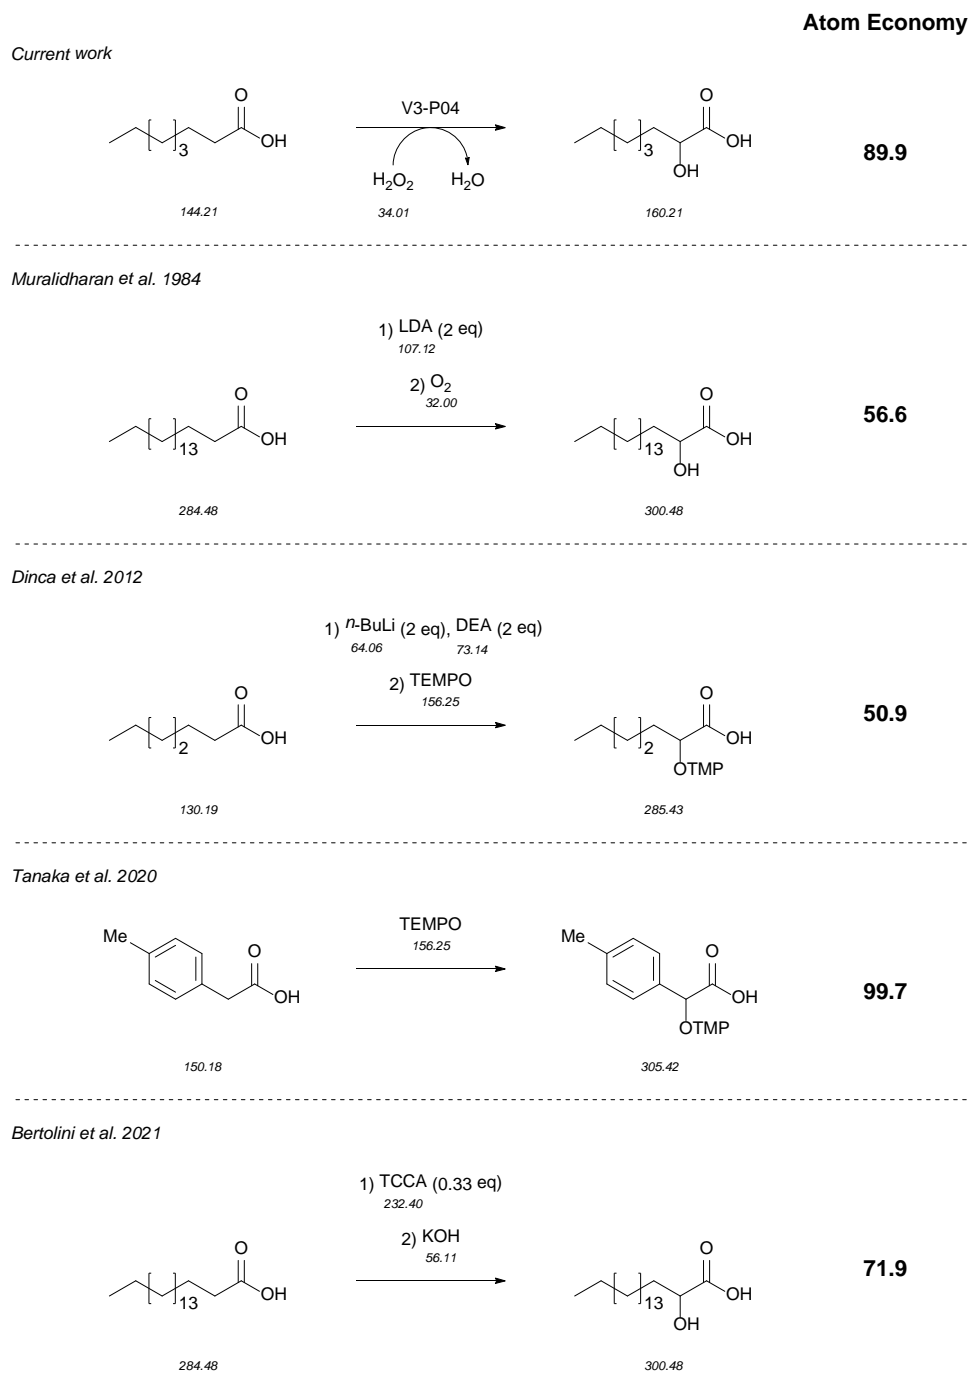

Scheme S3: Atom Economy values for synthetic processes for the preparation of  $\alpha$ -hydroxy acids.

## Gene and protein sequences

DNA sequences are shown from restriction site to restriction site (restriction sites are underlined), bases of backbone are shown in lower case letter, bases of gene of interest in upper case letters. The pEG number refers to the group internal plasmid collection (plasmid of the elk group).

The protein sequence is shown as expressed and being present in the CFE including amino acids resulting from the expression vector (printed in lower case letters). Amino acids of the gene of interest are in upper case letters.

### **PO<sub>SP $\alpha$</sub> wt (pEG 371)**

#### Optimised DNA sequence:

catATGCCGAAAACACCGCATACCAAAGGTCCGGATGAAACCCTGAGCCTGCTG  
GCAGATCCGTATCGTTTTATTAGCCGTCAGTGTGTCAGCGTCTGGGTGCAAATGCC  
TTTGAAAGCCGTTTTCTGCTGAAAAAACAATTGTCTGAAAGGTGCAAAGCAG  
CCGAAATCTTTTATGATACCACCCGTTTTGAACGTGAAGGTGCAATGCCGGTTG  
CAATTCAGAAAACCCTGCTGGGTCAGGGTGGTGTTCAGGGTCTGGATGGTGAA  
ACCCATCGTCATCGTAAACAAATGTTTATGGGTCTGATGACACCGGAACGTGTT  
CGTGCACCTGGCACAGCTGTTTGAAGCAGAATGGCGTCGTGCAGTTCCGGGTTG  
GACCCGTAAAGGTGAAATTGTTTTTATGATGAACTGCATGAACCGCTGACCCG  
TGCAATTTGTGCATGGGCAGGCGTTCCGCTGCCGGATGATGAAGCAGGTAATC  
GTGCCGGTGAAGTGCCTGCACTGTTTGTGATGCAGCCGGTAGCGCAAGTCCGCGT  
CATCTGTGGTCACGTCTGGCACGTCGTGTTGATGCATGGGCCAAACGTATT  
ATTGAAGGTATTCGTGCAGGTAGCATTGGTAGCGGTAGCGGCACCGCAGCTTAT  
GCAATTGCCTGGCATCGTGATCGTCATGATGATCTGCTGAGTCCGCATGTTGCA  
GCAGTTGAACTGGTTAATGTTCTGCGTCCGACCGTTGCCATTGCAGTGTATATTA  
CCTTTGTTGCACATGCACTGCAGACCTGTAGCGGTATTCGCGCAGCACTGGTTC  
AGCAGCCGGATTATGCAGAACTGTTTGTTCAGAAAGTGCCTGCTTTTATCCGT  
TTTTTCCGGCAGTTGTTGCACGTGCCAGCCAGGATTTTGAATGGGAAGGTATGG  
CATTTCCGGAAGGTCGTGAGGTTGTTCTGGATCTGTATGGTAGCAATCATGATG  
CAGCAACCTGGGCTGATCCGCAAGAATTTTCGTCCGGAACGCTTTCGCGCATGG  
GATGAAGATAGCTTTAACTTTATTCCGCAGGGTGGCGGTGATCATTATCTGGGT  
CATCGTTGTCCGGGTGAATGGATTGTTCTGGCAATTATGAAAGTTGCAGCACAT  
CTGCTGGTGAATGCAATGCGTTATGATGTTCCGGATCAGGATCTGAGCATTGAT  
TTTGCACGTCTGCCTGCACTGCCGAAAAGCGGTTTTGTTATGCGTAATGTTTCATA  
TCGGTGGCTAAActcgag

#### Protein sequence:

MPKTPHTKGPDETLSELLADPYRFISRQCQRLGANAFESRFLKKTNCLKGAKAAEIF  
YDTRFEREGAMPVAIQKTLGQGGVQGLDGETHRHRKQMFMLMTPERVRALA  
QLFEAEWRRVPGWTRKGEIVFYDELHEPLTRAVCAWAGVPLPDDEAGNRAGELR  
ALFDAAGSASPRHLWSRLARRRVDAAWKRIIEGIRAGSIGSGSGTAAYAIAWHRDR

HDDLSPHVAAVELVNVLRPTVAIAVYITFVAHALQTCSGIRAALVQQPDYAELFVQE  
VRRFYPPFFPAVVARASQDFEWEGMAFPEGRQVVLDLYGSNHDAATWADPQEFRP  
ERFRAWDEDSFNFIQGGGDHYLGHRCPEGWIVLAIMKVAHLLVNAMRYDVPDQ  
DLSIDFARLPALPKSGFVMRNVHIGG

**PO<sub>Spα</sub> variant V1 (pEG 690)**

Optimised DNA sequence:

catATGCCGAAAACACCTCATACCAAAGGCCCGGATGAAACCTTAAGCCTGCTGG  
CAGATCCGTATCGCTTCATTAGTCGCCAGTGTGAGCGTCTGGGTGCCAATGCAT  
TCGAAAGCCGCTTCCTGCTGAAAAAACCAATTGTCTGAAAGGTGCAAAAGCCG  
CAGAAATCTTCTATGATACCAACCCGCTTCGAACGTGAAGGCGCCATGCCGGTTG  
CAATTCAGAAAACCTTACTGGGCCAGGGCGGTGTGCAGGGCCTGGATGGTGAA  
ACACATCGTCATCGTAAACAGATGTTTCATGGGTCTGATGACCCCGGAACGCGTT  
CGCGCCCTGGCCCAACTGTTTGAAGCCGAATGGCGTCGTGCAGTGCCGGGCT  
GGACCCGTAAAGGCGAAATTGTGTTCTATGATGAACTGCATGAACCGCTGACCC  
GTGCAGTGTGTGCCTGGGCCGGCGTTCCGCTGCCTGATGATGAAGCAGGCAAT  
CGTGCAGGTGAACTGCGCGCACTGTTTCGATGCAGCCGGTAGCGCCAGTCCGC  
GCCATCTGTGGAGTCGCCTGGCACGCCGTCGTGTTGATGCATGGGCAAAACGC  
ATTATTGAAGGCATTCGTGCAGGCAGCATTGGTAGCGGTAGCGGCACCGCCGC  
ATACGCTATTGCATGGCATCGCGATCGCCATGATGATCTGCTGAGCCCGCATGT  
TGCCGCAGTGGAAGTGGTTAATGTGCTGCGCCCGACCGTGGCCATTGCCGTGT  
ATATTACCTTCGTTGCACATGCCCTGCAGACCCATAGTGGTATTTCGCGCCGCAC  
TGGTGCAGCAGCCGGATTATGCAGAACTGTTTCGTGCAGGAAGTTCGTGCTTCT  
ATCCGTTCTTCCCGGCAGTGGTGGCCCGTGCAAGCCAGGACTTCGAATGGGAA  
GGCATGGCCTTCCCGGAAGTTCGTCAGGTGGTTCTGGATCTGTATGGCAGTAA  
TCATGATGCAGCAACCTGGGCAGATCCGCAGGAATTCCGTCCGGAACGCTTCC  
GCGCATGGGATGAAGATAGCTTCAACTTCATTCCGCAGGGTGGTGGTGCATT  
ATCTGGGCCATCGCTGTCCGGGCGAATGGATTGTTCTGGCCATTATGAAAGTTG  
CAGCACATCTGCTGGTTAATGCCATGCGCTATGATGTGCCGGATCAGGATCTGA  
GTATTGACTTCGCCCCGCTGCCGGCCCTGCCGAAAAGCGGCTTCGTGATGCGC  
AATGTTTCATATTGGCGGCTAActcgag

Protein sequence:

MPKTPHTKGPDETLSELLADPYRFISRQCQRLGANAFESRFLKKTNCLKGAKAAEIF  
YDTRFEREGAMPVAIQKTLGQGGVQGLDGETHRHRKQMFMLMTPERVRLA  
QLFEAEWRRVPGWTRKGEIVFYDELHEPLTRAVCAWAGVPLPDDEAGNRAGELR  
ALFDAAGSASPRHLWSRLARRRVDAAWAKRIIEGIRAGSIGSGSGTAAYAIWHRDR  
HDDLSPHVAAVELVNVLRPTVAIAVYITFVAHALQTHSGIRAALVQQPDYAELFVQE  
VRRFYPPFFPAVVARASQDFEWEGMAFPEGRQVVLDLYGSNHDAATWADPQEFRP  
ERFRAWDEDSFNFIQGGGDHYLGHRCPEGWIVLAIMKVAHLLVNAMRYDVPDQ  
DLSIDFARLPALPKSGFVMRNVHIGG

**PO<sub>SPα</sub> variant V2** (pEG 692)

Optimised DNA sequence:

catATGCCGAAAACACCTCATACCAAAGGCCCGGATGAAACCTTAAGTCTGCTGG  
CAGATCCGTATCGCTTCATTAGCCGTCAGTGTCAGCGTCTGGGTGCAAATGCAT  
TCGAAAGTCGCTTCCTGCTGAAAAAAACCAATTGTCTGAAAGGTGCAAAAGCCG  
CCGAAATCTTCTATGATACCACCCGCTTCGAACGTGAAGGTGCAATGCCGGTGG  
CAATTCAGAAAACCTTACTGGGTCAGGGCGGTGTGCAGGGCCTGGATGGTGAA  
ACACATCGCCATCGCAAACAGATGTTTCATGGGCCTGATGACCCCGGAACGCGT  
TCGCGCACTGGCACAGCTGTTCTGAAGCCGAATGGCGTTCGTGCCGTTCCGGGTT  
GGACCCGCAAAGGTGAAATTGTGTTCTATGATGAACTGCATGAACCGCTGACCC  
GCGCAGTGTGTGCATGGGCCGGTGTGCCGCTGCCGGATGATGAAGCCGGCAA  
TCGTGCAGGTGAACTGCGCGCCCTGTTTCGATGCAGCCGGTAGCGCAAGTCCGC  
GCCATCTGTGGAGCCGTCTGGCCCGTCCGCGTGTGATGCCTGGGCCAAACGC  
ATTATTGAAGGTATTCGCGCAGGCAGCATTGGCAGTGGTAGTGGTACCGCCGC  
AGTTGCAATTGCATGGCATCGTGATCGTCATGATGATCTGCTGAGTCCGCATGT  
GGCCGCCGTGGAAGTGGTGAATGTTCTGCGTCCGACCGTTGCAATTGCGGTGT  
ATATTACCTTCGTGGCCCATGCCCTGCAGACCCATAGTGGTATTCGTGCAGCAC  
TGGTTCAGCAGCCGGATTATGCCGAACTGTTTCGTTTCAGGAAGTTCGTTCGCTTCT  
ATCCGTTCTTCCCGGCAGTGGTTGCCCGCGCAAGCCAGGACTTCGAATGGGAA  
GGTATGGCCTTCCCGGAAGGCCGTCAGGTGGTGTGCTGGATCTGTATGGTAGTAA  
TCATGATGCAGCAACCTGGGCCGATCCGCAGGAATTCCGTCCGGAACGCTTCC  
GTGCATGGGATGAAGATAGCTTCAACTTCATTCCGCAGGGTGGTGGTGTATCATG  
TTCTGGGCCATCGTTGTCCGGGCGAATGGATTGTGCTGGCCATTATGAAAGTTG  
CAGCACATCTGCTGGTGAATGCCATGCGCTATGATGTTCCGGATCAGGATCTGA  
GCATTGACTTCGCCCGCCTGCCGGCCCTGCCGAAAAGCGGCTTCGTGATGCGT  
AATGTTTCATATTGGTGGTTAAActcgag

Protein sequence:

MPKTPHTKGPDETLSELLADPYRFISRQCQRLGANAFESRFLKKTNCLKGAKAAEIF  
YDTRFEREGAMPVAIQKTLGQGGVQGLDGETHRHRKQMFMLMTPERVRLA  
QLFEAEWRRVPGWTRKGEIVFYDELHEPLTRAVCAWAGVPLPDDEAGNRAGELR  
ALFDAAGSASPRHLWSRLARRRVDAAWKRIIEGIRAGSIGSGSGTAAVAIWHRDR  
HDDLSPHVAAVELVNVLRPTVAIAVYITFVAHALQTHSGIRAALVQQPDYAEFLVQE  
VRRFYPFFPAVVARASQDFEWEGMAFPEGRQVVLDLYGSNHDAATWADPQEFRP  
ERFRAWDEDSFNFIQQGGGDHVLGHRCPGEWIVLAIMKVAHLLVNAMRYDVPDQ  
DLSIDFARLPALPKSGFVMRNVHIGG

**PO<sub>SPα</sub> variant V3** (pEG 691)

Optimised DNA sequence:

catATGCCGAAAACACCTCATACCAAAGGCCCGGATGAAACCTTAAGTCTGCTGG  
CAGATCCGTATCGCTTCATTAGCCGTCAGTGTCAGCGCCTGGGCGCAAATGCAT  
TCGAAAGCCGCTTCCTGCTGAAAAAAACCAATTGTCTGAAAGGTGCAAAAGCAG  
CAGAAATCTTCTATGATACCACCCGCTTCGAACGTGAAGGCGCCATGCCGGTTG  
CCATTCAGAAAACCTTACTGGGCCAGGGCGGCGTTCAGGGCCTGGATGGTGAA

ACACATCGTCATCGTAAACAGATGTTTCATGGGCCTGATGACCCCGGAACGCGTG  
CGTGCACTGGCCCAGCTGTTCTGAAGCAGAATGGCGCCGTGCAGTTCCGGGTTG  
GACCCGCAAAGGCCGAAATTGTGTTCTATGATGAACTGCATGAACCGCTGACCCG  
CGCAGTGTGCGCCTGGGCAGGTGTGCCTCTGCCGGATGATGAAGCAGGCAATC  
GTGCCGGCGAACTGCGTGCCTGTTTCGATGCAGCCGGCAGTGCCAGCCCGCG  
TCATCTGTGGAGCCGCCTGGCCCGTCGCCGTGTTGATGCATGGGCAAACGTA  
TTATTGAAGGCATTTCGCGCAGGCAGTATTGGTAGCGGCAGTGGTACCGCCGCA  
CAGGCAATTGCCTGGCATCGCGATCGTCATGATGATCTGCTGAGCCCGCATGT  
GGCCGCAGTTGAACTGGTTAATGTTCTGCGCCCGACCGTGGCCATTGCAGTGT  
ATATTACCTTCGTTGCACATGCACTGCAGACCCATAGTGGTATTTCGTGCCGCAC  
TGGTGCAGCAGCCGGATTATGCAGAACTGTTTCGTGCAGGAAGTTCGTGCTTCT  
ATCCGTTCTTCCCGGCCGTGGTGGCACGTGCAAGTCAGGACTTCGAATGGGAA  
GGCATGGCCTTCCCGGAAGGTCGCCAGGTGGTTCTGGATCTGTATGGTAGTAA  
TCATGATGCCGCAACCTGGGCCGATCCGCAGGAATTCCGCCCGGAACGCTTCC  
GCGCATGGGATGAAGATAGCTTCAACTTCATTCCGCAGGGTGGTGGCGATCAT  
CAGCTGGGCCATCGCTGTCCGGGTGAATGGATTGTGCTGGCAATTATGAAAGT  
GGCAGCCCATCTGCTGGTTAATGCCATGCGCTATGATGTTCCGGATCAGGATCT  
GAGCATTGACTTCGCCCGTCTGCCGGCACTGCCGAAAAGTGGCTTCGTTATGC  
GTAATGTTTCATATTGGTGGCTAAActcgag

Protein sequence:

MPKTPHTKGPDETLSELLADPYRFISRQCQRLGANAFESRFLKKTNCLKGAKAAEIF  
YDTRFEREGAMPVAIQKLLGQGGVQGLDGETHRHRKQMFMLMTPERVRALA  
QLFEAEWRRVPGWTRKGEIVFYDELHEPLTRAVCAWAGVPLPDDEAGNRAGELR  
ALFDAAGSASPRHLWSRLARRRVDAAWKRIIEGIRAGSIGSGSGTAAQAIWHRDR  
HDDLSPHVAAVELVNVLRPTVAIAVYITFVAHALQTHSGIRAALVQQPDYAELFVQE  
VRRFYPPFFPAVVARASQDFEWEGMAFPEGRQVVLVDLYGSNHDAATWADPQEFRP  
ERFRAWDEDSFNFIQQGGDHLGHRCPGEWIVLAIMKVAHLLVAMRYDVPDQ  
DLSIDFARLPALPKSGFVMRNVHIGG

**PO<sub>Spα</sub> variant V1-P02 (pEG 696)**

Optimised DNA sequence:

catATGCCGAAAACACCTCATACCAAAGGTCCGGATGAAACCTTAAGTCTGCTGG  
CAGATCCGTATCGCTTCATTAGTCGTCAGTGCCAGCGTCTGGGCAGCAATGCAT  
TCGAAACCAGATTCTGCTGAAAAAACCATCTGTCTGAAAGGCCGAAAAGCAG  
CAGAAATCTTCTATGATACCACCCGCTTCGAACGCGAAGGTGCCATGCCGAAAG  
CCATTCAGAAAACCTTACTGGGTGAGGGCGGTGTTTCAGGGTCTGGATGGTGAA  
GCACATCGTCATCGCAAACAGATGTTTCATGAGTCTGATGACCCCGGAACGTGTT  
CGCGCCCTGGCACAGCTGTTCTGAAGCCGAATGGCGTCGTGCCGTTGAAGATTG  
GACCCGCAAAGGCCGAAATTGTGTTCTATGATGAACTGCATGAAATTCTGACCCG  
TGCCGTGTGCGCCTGGGCCGGTGTTCCTCTGCCGGATGATGAAGCCAAAAATC  
GTGCACGCGAACTGCGTGCCTGTTTCGATGCAGCAGGTAGCGCAAGCCCGCG  
CCATCTGTGGAGCCGTCTGGCCCGTCGTCGCGTGGATGCATGGGCAAACGTA  
TTATTGAAGGTATTTCGCGCCGGTAAAATTCCGGCACCGGAAGGTACCGCAGCCT  
ATGCCATTGCCTGGCATCGCGATCTGCATGGTAAACTGCTGAGCCCGCATGTTG  
CCGCAGTTGAACTGGTGAATGTGCTGCGCCCGACCGTGGCCATTGCAGTGTAT

ATTACCTTCGTTGCACATGCCCTGCATACCCATCCGGGTATTCGCGAAGCCCTG  
CGCCAGGATCCGATTATGCCGAAGTTCGCGGCTTCTAT  
CCGTTCTTCCCGGCCGTGGTGGCACGTGCACGCCAGGACTTCGAATGGGAAGG  
TATGGCCTTCCCGGAAGGCCGTCAGGTTGTTCTGGATCTGTATGGTACCAATCA  
TGATGCAGCAACCTGGGAAGATCCGCAGGAATTCCGTCCGGAACGCTTCCGTG  
ATTGGGATGAAGATCCGTTCACTTCATTCCGCAGGGCGGGCGGCGATCATTATC  
TGGGTCATCGTTGTCCGGGTGAATGGATTGTGCTGGCAATTATGAAAGTTGCCG  
CACATCTGCTGGTTAATGCCATGCGCTATGATGTTCCGGATCAGGATCTGAGCA  
TTGACTTCAGCCGTCTGCCGGCCCTGCCGAAAAGCGGCTTCGTTATGCGTAATG  
TGCATATTGGTGGCTAAActcgag

Protein sequence:

MPKTPHTKGPDETLSELLADPYRFISRQCQRLGSNAFETRFLLKKTICLKGAKEEIFY  
DTTRFEREGAMPKAIQKTLGQGGVQGLDGEAHRHRKQMFMSLMTPERVRLAQL  
FEAEWRRAVEDWTRKGEIVFYDELHEILTRAVCAWAGVPLPDDEAKNRARELRALF  
DAAGSASPRHLWSRLARRRVDAAKRIIEGIRAGKIPAPETAAYAIWHRDLHGKL  
LSPHVAAVELVNLVLRPTVAIAVYITFVAHALHHPGIREALRQDPDYAELFVQEVRRF  
YPPFAVVARARQDFEWEGMAFPEGRQVLDLYGTNHDAATWEDPQEFRPERFR  
DWDEDPFNFIQGGGDHLYLGHRCPGEWIVLAIMKVAHLLVAMRYDVPDQDLSID  
FSRLPALPKSGFVMRNVHIGG

**PO<sub>SPα</sub> variant V2-P02 (pEG 698)**

Optimised DNA sequence:

catATGCCGAAAACACCTCATACCAAAGGCCCGGATGAAACCTTAAGTCTGCTGG  
CCGATCCGTATCGCTTCATTAGCCGTCAGTGCCAGCGTCTGGGTAGTAATGCCT  
TCGAAACCAGATTCTGCTGAAAAAACCATCTGTCTGAAAGGTGCAAAAGCAG  
CCGAAATCTTCTATGATACCACCCGCTTCGAACGCGAAGGTGCCATGCCGAAAG  
CAATTCAGAAAACCTTACTGGGCCAGGGCGGCGTGCAGGGCCTGGACGGTGAA  
GCACATCGCCATCGCAAACAGATGTTTCATGAGTCTGATGACCCCGGAACGTGTT  
CGTGCACCTGGCACAGCTGTTTCGAAGCCGAATGGCGTTCGTGCAGTGGAAAGATTG  
GACCCGCAAAGGTGAAATTGTGTTCTATGATGAACTGCATGAAATTCTGACCCG  
CGCAGTGTGCGCATGGGCCGGTGTTCGCTGCCGGATGATGAAGCAAAAAATC  
GCGCACGTGAACTGCGCGCCCTGTTTCGATGCCGCCGGCTCAGCAAGTCCGCG  
CCATCTGTGGAGCCGTCTGGCACGCCGCCGTGTTGATGCCTGGGCCAAACGCA  
TTATTGAAGGTATTCGCGCCGGCAAATTCGCGCCCCGGAAGGTACCGCAGCA  
GTGGCAATTGCCTGGCATCGTGATCTGCATGGCAAACCTGCTGAGCCCGCATGTT  
GCCGCCGTTGAACTGGTGAATGTTCTGCGTCCGACCGTGGCAATTGCAGTGTAT  
ATTACCTTCGTGGCACATGCACTGCATACCCATCCGGGTATTCGCGAAGCCCTG  
CGCCAGGATCCGATTATGCAGAAGTTCGTTTCAGGAAGTGCGCCGCTTCTAT  
CCGTTCTTCCCGGCCGTGGTGGCCCGTGCACGTTCAGGACTTCGAATGGGAAGG  
CATGGCATTCCCGGAAGGTGCCAGGTTGTGCTGGATCTGTATGGTACCAATCA  
TGATGCCGCCACCTGGGAAGATCCGCAGGAATTCCGTCCGGAACGCTTCCGTG  
ATTGGGATGAAGATCCGTTCACTTCATTCCGCAGGGTGGCGGGCGATCATGTTG  
TGGGCCATCGCTGTCCGGGCGAATGGATTGTGCTGGCCATTATGAAAGTGGCC  
GCACATCTGCTGGTGAATGCCATGCGTTATGATGTTCCGGATCAGGATCTGAGT

ATTGACTTCAGTCGTCTGCCGGCACTGCCGAAAAGTGGCTTCGTTATGCGTAAT  
GTTTCATATTGGCGGTTAAActcgag

Protein sequence:

MPKTPHTKGPDETLSELLADPYRFISRQCQRLGNSAFETRFLKKTICLKGAKEEIFY  
DTTRFEREGAMPKAIQKTLGQGGVQGLDGEAHRHRKQMFMSLMTPERVRALAQL  
FEAEWRRAVEDWTRKGEIVFYDELHEILTRAVCAWAGVPLPDDEAKNRARELRALF  
DAAGSASPRHLWSRLARRRVDWAKRIIEGIRAGKIPAPEGTAAVAIAWHRDLHGK  
LSPHVAAVELVNVLRPTVAIAVYITFVAHALHHPGIREALRQDPDYAELFVQEVRRF  
YPPFFAVVARARQDFEWEGMAFPEGRQVLDLYGTNHDAATWEDPQEFRPERFR  
DWDEDPFNFIPQGGGDHVLGHRCPGEWIVLAIMKVAHLLVAMRYDVPDQDLSID  
FSRLPALPKSGFVMRNVHIGG

**PO<sub>SPα</sub> variant V3-P02** (pEG 697)

Optimised DNA sequence:

catATGCCGAAAACACCTCATACCAAAGGCCCGGATGAAACCTTAAGTCTGCTGG  
CAGATCCGTATCGCTTCATTAGTCGTCAAGTCCAGCGTCTGGGCAGTAATGCCT  
TCGAAACCAGATTCTGCTGAAAAAACCATCTGTCTGAAAGGTGCAAAAGCAG  
CCGAAATCTTCTATGATACCACCCGCTTCGAACGTGAAGGTGCCATGCCGAAAG  
CAATTCAGAAAACCTTACTGGGTCAGGGCGGTGTTTCAGGGCCTGGATGGTGAA  
GCACATCGCCATCGTAAACAGATGTTTCATGAGTCTGATGACCCCGGAACGCGTG  
CGTGCCCTGGCCCAACTGTTGCAAGCAGAATGGCGTTCGTGCAGTGGAAAGATTG  
GACCCGTAAAGGCGAAATTGTGTTCTATGATGAACTGCATGAAATTCTGACCCG  
TGCAGTGTGTGCATGGGCAGGTGTGCCGCTGCCGGATGATGAAGCCAAAAATC  
GTGCACGCGAACTGCGCGCACTGTTTCGATGCAGCCGGTAGTGCAAGTCCGCGC  
CATCTGTGGAGTCGTCTGGCACGTCGTCGCGTGGATGCATGGGCCAAACGTAT  
TATTGAAGGCATTCGTGCAGGCAAAATTCCGGCCCCGGAAGGTACCGCCGCC  
AGGCAATTGCATGGCATCGTGATCTGCATGGCAAACCTGCTGAGCCCGCATGTTG  
CCGCAGTTGAACTGGTTAATGTTCTGCGTCCGACCGTTGCCATTGCAGTGTATA  
TTACCTTCGTGGCCCATGCCCTGCATACCCATCCGGGTATTTCGTGAAGCCCTGC  
GCCAGGATCCGGATTATGCCGAACTGTTTCGTTTCAGGAAGTGCGCCGCTTCTATC  
CGTTCTTCCCGGCCGTGGTGGCACGCGCACGTCAGGACTTTCGAATGGGAAGGC  
ATGGCATTCCCGGAAGGCCGTCAGGTTGTTCTGGATCTGTATGGTACCAATCAT  
GATGCCGCCACCTGGGAAGATCCGCAGGAATTCCGCCCGGAACGCTTCCGTGA  
TTGGGATGAAGATCCGTTCAACTTCATTCCGCAGGGCGGTGGCGATCATCAGCT  
GGGTCATCGCTGTCCGGGTGAATGGATTGTTCTGGCAATTATGAAAGTGGCCG  
CACATCTGCTGGTGAATGCAATGCGTTATGATGTTCCGGATCAGGATCTGAGTA  
TTGACTTCAGTCGCCTGCCGGCCCTGCCGAAAAGCGGCTTCGTTATGCGTAATG  
TGCATATTGGCGGTTAAActcgag

Protein sequence:

MPKTPHTKGPDETLSELLADPYRFISRQCQRLGNSAFETRFLKKTICLKGAKEEIFY  
DTTRFEREGAMPKAIQKTLGQGGVQGLDGEAHRHRKQMFMSLMTPERVRALAQL  
FEAEWRRAVEDWTRKGEIVFYDELHEILTRAVCAWAGVPLPDDEAKNRARELRALF  
DAAGSASPRHLWSRLARRRVDWAKRIIEGIRAGKIPAPEGTAQAIAWHRDLHGK  
LLSPHVAAVELVNVLRPTVAIAVYITFVAHALHHPGIREALRQDPDYAELFVQEVRR

FYPFFPAVVARARQDFEWEGMAFPEGRQVVL DLYGTNHDAATWEDPQEFRPERF  
RDWDEDPFNFIPQGGGDHQLGHRCPGEWIVLAIMKVA AHLLVNAMRYDVPDQDLSI  
DFSRLPALPKSGFVMRNVHIGG

**PO<sub>SPα</sub> variant V1-P03** (pEG 699)

Optimised DNA sequence:

catATGCCGAAAACACCTCATACCAAAGGCCCGGATGAAACCTTAGCACTGCTGG  
CCGATCCGTATCGCTTCATTAGTCGCCAGTGCCAGCGTCTGGGTAGTAATGCCT  
TCGAAACCAGATTCTGCTGAAAAAAACCATCTGTCTGCGTGGCGCCAAAGCAG  
CCGAAATCTTCTATGATACCACCCGCTTCCAGCGCGAAGGCGCCATGCCGAAA  
GCCATTCAGAAAACCTTACTGGGCCAGGGTGGTGTTCAGGGTCTGGATGGCGA  
AGCCCATCGCCATCGCAAACAGATGTTTCATGAGTCTGATGACCCCGGAACGCG  
TTCGTGCACTGGCCCAGCTGTTGGAAGCCGAATGGCGCCGCGCAGTTGAACGT  
TGGACCCGCAAAGGTGAAATTGTGTTCTATGATGAACTGCATGAAATTCTGACC  
CGCGCCGTGTGTGCCTGGGCAGGTGTTCCGCTGCCGGATGATGAAGCCAAAAA  
TCGCGCCCCGCGAACTGCGTGCCCTGTTTCGATGCAGCAGGTAGTGCAAGCCCGC  
GTCATCTGTGGAGTCGCCTGGCACGTCGCCGCGTTGATGCCTGGGCAAACGT  
ATTATTGAAGGTATTCGCGCAGGCCAAAATTCCGGCCCCGGAAGGCACCCGCAGC  
ATACGCTATTGCATGGCATCGTGATCTGCATGGCAAACCTGCTGAGTCCGCATGT  
TGCAGCAGTTGAACTGGTGAATGTGCTGCGTCCGACCGTGGCAATTGCAGTGT  
ATATTACCTTCGTGGCACATGCCCTGCATACCCATCCGGGTATTTCGTGAAGCCC  
TGCCTCAGGATCCGGATTATGCAGA ACTGTTTCGTGCAGGAAGTGCCTCGCTTCT  
ATCCGTTCTTCCCGGCAGTTGTTGCACGCGCACGCCAGGACTTCGAATGGGAA  
GGCATGGCATTCCCGGAAGGTCGTCAGGTTGTGCTGGATCTGTATGGCACCAA  
TCATGATGCCGCAACCTGGGAAGATCCGCAGGAATTCCGTCCGGAACGCTTCC  
GCGATTGGGATGAAGATCCGTTCAACTTCATTCCGCAGGGTGGCGGCGATCATT  
ATCTGGGCCATCGTTGTCCGGGTGAATGGATTGTTCTGGCAATTATGAAAGTGG  
CAGCCCATCTGCTGGTTAATGCCATGCGTTATGATGTGCCGGATCAGGATCTGA  
GCATTGACTTCAGTCGCCTGCCGGCCCTGCCGAAAAGTGGCTTCGTTATGCGTA  
ATGTGCATATTGGTGGCTAActcgag

Protein sequence:

MPKTPHTKGPDETLALLADPYRFISRQCQRLG SNAFETRFLKKTICLRGAKAAEIFY  
DTTRFQREGAMPKAIQKTLGQGGVQGLDGEAHRHRKQMFMSLMTPERVRLAQ  
LFEAEWRRRAVERWTRKGEIVFYDELHEILTRAVCAWAGVPLPDDEAKNRARELRAL  
FDAAGSASPRHLWSRLARRRVD AWAKRIIEGIRAGKIPAPEGTAAYIAWHRDLHGK  
LLSPHVA AVELVNVLRPTVAIAVYITFVAHALHTHPGIREALRQDPDYAELFVQEVRR  
FYPFFPAVVARARQDFEWEGMAFPEGRQVVL DLYGTNHDAATWEDPQEFRPERF  
RDWDEDPFNFIPQGGGDHQLGHRCPGEWIVLAIMKVA AHLLVNAMRYDVPDQDLSI  
DFSRLPALPKSGFVMRNVHIGG

**PO<sub>SPα</sub> variant V2-P03 (pEG 701)**

Optimised DNA sequence:

catATGCCGAAAACACCTCATACCAAAGGTCCGGATGAAACCTTAGCACTGCTGG  
CCGATCCGTATCGCTTCATTAGTCGCCAGTGTGAGCGTCTGGGTAGCAATGCCT  
TCGAAACCAGATTCTGCTGAAAAAAACCATCTGTCTGCGCGGTGCAAAGCAG  
CAGAAATCTTCTATGATACCACCCGCTTCCAGCGTGAAGGTGCAATGCCGAAAG  
CCATTCAGAAAACCTTACTGGGCCAGGGTGGTGTGCAGGGTCTGGATGGTGAA  
GCACATCGCCATCGCAAACAGATGTTTCATGAGCCTGATGACCCCGGAACGTGT  
GCGTGCCCTGGCACAGCTGTTTCAAGCCGAATGGCGTCGCGCAGTTGAACGCT  
GGACCCGTAAAGGCGAAATTGTGTTCTATGATGAACTGCATGAAATTCTGACCC  
GTGCCGTGTGTGCATGGGCAGGTGTGCCGCTGCCGGATGATGAAGCCAAAAAT  
CGCGCACGTGAACTGCGTGCCCTGTTTCATGCCGCAGGTAGTGCCAGCCCGC  
GTCATCTGTGGAGTCGTCTGGCACGTCGTGCGGTTGATGCCTGGGCCAAACGT  
ATTATTGAAGGCATTCGTGCCGGTAAAATTCCGGCACCCGGAAGGTACCGCCGC  
CGTTGCAATTGCATGGCATCGCGATCTGCATGGTAAACTGCTGAGCCCGCATGT  
TGCAGCCGTTGAACTGGTGAATGTGCTGCGCCCGACCGTGGCAATTGCCGTGT  
ATATTACCTTCGTGGCACATGCCCTGCATACCCATCCGGGTATTTCGTGAAGCCC  
TGCGCCAGGATCCGGATTATGCCGAACTGTTTCGTTTCAGGAAGTTCGCCGCTTCT  
ATCCGTTCTTCCCGGCAGTTGTGGCCCGTGCACGCCAGGACTTCGAATGGGAA  
GGCATGGCCTTCCCGGAAGGTCGCCAGGTTGTGCTGGATCTGTATGGTACCAA  
TCATGATGCAGCCACCTGGGAAGATCCGCAGGAATTCCGTCCGGAACGCTTCC  
GTGATTGGGATGAAGATCCGTTCAACTTCATTCCGCAGGGTGGCGGCGATCAT  
GTTCTGGGCCATCGTTGTCCGGGTGAATGGATTGTTCTGGCCATTATGAAAGTG  
GCAGCCCATCTGCTGGTGAATGCCATGCGCTATGATGTTCCGGATCAGGATCTG  
AGCATTGACTTCAGCCGCCTGCCGGCACTGCCGAAAAGCGGCTTCGTTATGCG  
CAATGTGCATATTGGTGGCTAActcgag

Protein sequence:

MPKTPHTKGPDETLALLADPYRFISRQCQRLGNSAFETRFLKKTICLRGAKAAEIFY  
DTTRFQREGAMPKAIQKTLGQGGVQGLDGEAHRHRKQMFMSLMTPERVRALAQ  
LFEAEWRRRAVERWTRKGEIVFYDELHEILTRAVCAWAGVPLPDDEAKNRARELRAL  
FDAAGSASPRHLWSRLARRRVDAAWAKRIIEGIRAGKIPAPEGTA AVAIAWHRDLHGK  
LLSPHVA AVELVNVLRPTVAIAVYITFVAHALHHPGIREALRQDPDYAELFVQEVRR  
FYPPFFPAVVARARQDFEWEGMAFPEGRQVVL DLYGTNHDAATWEDPQEFRPERF  
RDWDEDPFNFIPQGGGDHVLGHRCPGEWIVLAIMKVA AHLLV NAMRYDVPDQDLSI  
DFSRLPALPKSGFVMRNVHIGG

**PO<sub>SPα</sub> variant V3-P03 (pEG 700)**

Optimised DNA sequence:

catATGCCGAAAACACCTCATACCAAAGGCCCGGATGAAACCTTAGCACTGCTGG  
CCGATCCGTATCGCTTCATTAGTCGTCAGTGCCAGCGCCTGGGTAGTAATGCAT  
TCGAAACCAGATTCTGCTGAAAAAAACCATCTGTCTGCGCGGTGCCAAAGCAG  
CAGAAATCTTCTATGATACCACCCGCTTCCAGCGCGAAGGTGCAATGCCGAAAG  
CCATTCAGAAAACCTTACTGGGTCAGGGCGGTGTGCAGGGCCTGGATGGTGAA

GCACATCGCCATCGCAAACAGATGTTTCATGAGCCTGATGACCCCGGAACGTGTT  
CGTGCACTGGCACAGCTGTTCTGAAGCAGAATGGCGCCGTGCAGTGGAAACGTTG  
GACCCGTAAAGGTGAAATTGTGTTCTATGATGAACTGCATGAAATTCTGACCCGT  
GCAGTGTGTGCCTGGGCAGGTGTTCCGCTGCCGGATGATGAAGCAAAAAATCG  
TGCCCGTGAAGTGCAGCGCACTGTTTCGATGCCGCAGGTAGCGCAAGCCCGCGC  
CATCTGTGGAGCCGCTGGCTCGTCGCCGTGTGGATGCATGGGCAAACGTAT  
TATTGAAGGTATTCGCGCAGGCCAAAATTCCGGCACCGGAAGGCACCGCCGCAC  
AGGCAATTGCATGGCATCGCGATCTGCATGGCAAACCTGCTGAGTCCGCATGTG  
GCCGCAGTGGAACTGGTGAATGTTCTGCGCCCGACCGTTGCAATTGCAGTGTA  
TATTACCTTCGTGGCACATGCACTGCATACCCATCCGGGTATTCGTGAAGCCCT  
GCGTCAGGATCCGGATTATGCCGAACTGTTTCGTGCAGGAAGTTCGCCGCTTCTA  
TCCGTTCTTCCCGGCAGTTGTGGCACGCGCCCGCCAGGACTTCGAATGGGAAG  
GTATGGCCTTCCCGGAAGGCCGTGAGGTGGTGGTGGATCTGTATGGCACCAAT  
CATGATGCCGCAACCTGGGAAGATCCGCAGGAATTCCGTCCGGAACGCTTCCG  
TGATTGGGATGAAGATCCGTTCAACTTCATTCCGCAGGGCGGTGGTGGTGGTGGT  
GCTGGGCCATCGCTGTCCGGGTGAATGGATTGTTCTGGCCATTATGAAAGTTGC  
CGCACATCTGCTGGTGAATGCCATGCGTTATGATGTTCCGGATCAGGATCTGAG  
CATTGACTTCAGTCGCCTGCCGGCACTGCCGAAAAGCGGCTTCGTGATGCGCA  
ATGTTTCATATTGGCGGCTAActcgag

Protein sequence:

MPKTPHTKGPDETLALLADPYRFISRQCQRLGSAFETRFLKKTICLRGAKAAEIFY  
DTTRFQREGAMPKAIQKTLGQGGVQGLDGEAHRHRKQMFMSLMTPERVRALAQ  
LFEAEWRRRAVERWTRKGEIVFYDELHEILTRAVCAWAGVPLPDDEAKNRARELRAL  
FDAAGSASPRHLWSRLARRRVDAAWKRIIEGIRAGKIPAPEGTAAQAIWHRDLHG  
KLLSPHVAAVELVNLVLRPTVAIAVYITFVAHALHTHPGIREALRQDPDYAELFVQEV  
RFYPPFFPAVVARARQDFEWEGMAFPEGRQVLDLYGTNHDAATWEDPQEFRPER  
FRDWDEDPFNFIPQGGGDHQLGHRCPGEWIVLAIMKVAHLLVNAMRYDVPDQDL  
SIDFSRLPALPKSGFVMRNVHIGG

**PO<sub>SPα</sub> variant V1-P04** (pEG 702)

Optimised DNA sequence:

catATGCCGAAAACACCTCATACCAAAGGTCCGGATGAAACCTTAGCACTGCTGG  
CAGATCCGTATCGCTTCATTAGTCGTCAGTGCCAGCGCCTGGGTACCAATGCAT  
TCGAAACCAGATTCTGCTGAAAAAACCATCTGTCTGCGCGGTGCCAAAGCCG  
CAGAAATCTTCTATGATACCACCCGCTTCCAGCGTCATGGCGCAATGCCGAAAG  
CAATTCAGAAAACCTTACTGGGTGAGGGCGGCGTTCAGGGTCTGGATGGTGAA  
GCACATCGCCATCGCAAACAGATGTTTCATGAGCCTGATGACCCCGGAACGTGTT  
CGCGCACTGGCACAGCTGTTCTGAAGCAGAATGGCGTCGCGCAGTTGAACGCTG  
GACCCGCAAAGGCCGAAATTGTGTTCTATGATGAACTGCATGAAATTCTGACCCG  
CGCCGTGTGTGCATGGGCCGGTGTTCGCTGCCGGATGATGAAGCAGAAAAAC  
GCGCACGTGAACTGCGTGCAGTGTTCGATGCCGCAGGCAGCGCAAGTCCGCGT  
CATCTGTGGAGTCGTTGGGCCCGTCGCCGTGTGGATGCATGGGCCAAACGTAT  
TATTGAAGGTATTCGTGCAGGCCAAAATTCCGGCACCGGAAGGCACCGCCGCAT  
ACGCTATTGCCTGGCATCGTGATCTGGATGGTTCGTCTGCTGAGTCCGCATGTTG  
CAGCAGTGGAACTGGTTAATGTGCTGCGTCCGACCGTTGCCATTGCCGTGTATA

TTACCTTCGTGGCACATGCACTGCATACCCATCCGGGTATTCGCGAAGCACTGC  
GCCAGGATCCGGATTATGCCGAAGTTCGTTTCAGGAAGTTCGTCGCTTCTATC  
CGTTCTTCCCGGCAGTTGTTGCACGTGCACGCCAGGACTTCGAATGGGAAGGT  
TATGCATTCCCGGAAGGCCGCCAGGTTGTGCTGGATCTGTATGGTACCAATCAT  
GATGCAGCCATCTGGGAAGATCCGCAGGAATCCGTCCGGAACGCTTCCGTGA  
TTGGGATGAAGATCCGTTCAACTTCATTCCGCAGGGTGGTGGCGATCATTATCT  
GGGTCATCGCTGCCC GGTTGAATGGATTGTGCTGGCCATTATGAAAGTTGCCG  
CACATCTGCTGGTTAATGCAATGCGTTATGATGTTCCGCCGCAGGATCTGAGCA  
TTGACTTCAGTCGTCTGCCGGCACTGCCGAAAAGCGGCTTCGTTATGCGTAATG  
TGCATATTGGTGGCTAAActcgag

Protein sequence:

MPKTPHTKGPDETLALLADPYRFISRQCQRLGTNAFETRFLKKTICLRGAKAAEIFY  
DTTRFQRHGAMPKAIQKTLGQGGVQGLDGEAHRHRKQMFMSLMTPERVRALAQ  
LFEAEWRRRAVERWTRKGEIVFYDELHEILTRAVCAWAGVPLPDDEAEKRARELRAL  
FDAAGSASPRHLWSRWARRRVDAAWAKRIIEGIRAGKIPAPEGTAAYAIAWHRDLDG  
RLLSPHVAAVELVNVLRPTVAIAVYITFVAHALHHPGIREALRQDPDYAELFVQEV  
RFYPPFFPAVVARARQDFEWEGYAFPEGRQVVL DLYGTNHDAAIWEDPQEFRPERF  
RDWDEDPFNFIPQGGGDHYLGHRCPGEWIVLAIMKVAHLLV NAMRYDVPPQDLSI  
DFSRLPALPKSGFVMRNVHIGG

**PO<sub>SPα</sub> variant V2-P04** (pEG 704)

Optimised DNA sequence:

catATGCCGAAAACACCTCATACCAAAGGTCCGGATGAAACCTTAGCACTGCTGG  
CAGATCCGTATCGCTTCATTAGTCGTCAGTGCCAGCGTCTGGGTACCAATGCCT  
TCGAAACCAGATTCTGCTGAAAAAACCATCTGTCTGCGCGGCCCAAAGCCG  
CCGAAATCTTCTATGATACCACCCGCTTCCAGCGCCATGGCGCCATGCCGAAAG  
CAATTCAGAAAACCTTACTGGGT CAGGGTGGTGTGCAGGGTCTGGATGGCGAA  
GCACATCGTCATCGTAAACAGATGTT CATGAGCCTGATGACCCCGGAACGTGTT  
CGTGC ACTGGCACAGCTGTT CGAAGCCGAATGGCGTCCGCGCAGTGGAACGTTG  
GACCCGTAAAGGCCGAAATTGTGTTCTATGATGAACTGCATGAAATTCTGACCCG  
CGCAGTGTGTGCATGGGCCGGTGTTCGCTGCCGGATGATGAAGCCGAAAAAC  
GTGCCCGTGA ACTGCGTGCCCTGTT CGATGCCGCCGGCAGTGCCAGTCCGCGT  
CATCTGTGGAGTCGTTGGGCCCGCCGCCGCGTTGATGCATGGGCTAAACGCAT  
TATTGAAGGTATTCGTGCCGGCAAATTCCGGCACCGGAAGGCACCGCCGCCT  
ATGCAATTGCCTGGCATCGCGATCTGGATGGTTCGCTGCTGAGTCCGCATGTT  
GCCGCCGTTGAACTGGTGAATGTGCTGCGTCCGACCGTTGCCATTGCAGTGTA  
TATTACCTTCGTGGCACATGCCCTGCATACCCATCCGGGTATTCGCGAAGCACT  
GCGTCAGGATCCGGATTATGCAGAACTGTTCTGTCAGGAAGTGCGCCGCTTCT  
ATCCGTTCTTCCCGGCCGTTGTGGCACGCGCCCGCCAAGACTTCGAATGGGAA  
GGTTATGCATTCCCGGAAGGCCGCCAGGTTGTTCTGGATCTGTATGGTACCAAT  
CATGATGCAGCCATCTGGGAAGATCCGCAGGAATCCGTCCGGAACGCTTCCG  
CGATTGGGATGAAGATCCGTTCAACTTCATTCCGCAGGGTGGTGGT GATCATT  
TCTGGGCCATCGCTGCCC GGCGAATGGATTGTGCTGGCAATTATGAAAGTTG  
CAGCCCATCTGCTGGTGAATGCCATGCGTTATGATGTGCCGCCGCAGGATCTG

AGTATTGACTTCAGTCGCCTGCCGGCCCTGCCGAAAAGTGGCTTCGTGATGCG  
TAATGTGCATATTGGTGGTTAAActcgag

Protein sequence:

MPKTPHTKGPDETLALLADPYRFISRQCQRLGTNAFETRFLKKTICLRGAKAAEIFY  
DTTRFQRHGAMPKAIQKTLLGQGGVQGLDGEAHRHRKQMFMSLMTPERVRALAQ  
LFEAEWRRRAVERWTRKGEIVFYDELHEILTRAVCAWAGVPLPDDEAEKRARELRAL  
FDAAGSASPRHLWSRWARRRVDAAWAKRIIEGIRAGKIPAPEGTAAYAIAWHRDLG  
RLLSPHVAAVELVNLRPTVAIAVYITFVAHALHTHPGIREALRQDPDYAELFVQEV  
RFYPPFFPAVVARARQDFEWEGYAFPEGRQVVLDTYGTNHDAAIWEDPQEFRPERF  
RDWDEDPFNFIPQGGGDHYLGHRCPGEWIVLAIMKVAHLLVNAMRYDVPPQDLSI  
DFSRLPALPKSGFVMRNVHIGG

**PO<sub>SPα</sub> variant V3-P04** (pEG 703)

Optimised DNA sequence:

catATGCCGAAAACACCTCATACCAAAGGTCCGGATGAAACCTTAGCCCTGCTGG  
CAGATCCGTATCGCTTCATTAGCCGTCAGTGCCAGCGTCTGGGTACCAATGCCT  
TCGAAACCAGATTCTGCTGAAAAAAACCATCTGTCTGCGCGGTGCCAAAGCAG  
CCGAAATCTTCTATGATACCACCCGCTTCCAGCGTCATGGCGCAATGCCGAAAG  
CAATTCAGAAAACCTTACTGGGCCAGGGCGGTGTGCAGGGTCTGGATGGTGAA  
GCCATCGTCATCGCAAACAGATGTTTCATGAGCCTGATGACCCCGAACGTGTT  
CGCGCCCTGGCCCAGCTGTTTGAAGCCGAATGGCGCCGCGCAGTGGAACGCT  
GGACCCGTAAAGGCGAAATTGTGTTCTATGATGAACTGCATGAAATTCTGACCC  
GTGCCGTGTGTGCATGGGCCGGTGTGCCGCTGCCGGATGATGAAGCAGAAAAA  
CGCGCACGCGAACTGCGCGCACTGTTTCGATGCAGCCGGCAGTGCCAGTCCGC  
GCCATCTGTGGAGCCGCTGGGCCAGACGTCGCGTTGATGCATGGGCCAAACG  
CATTATTGAAGGCATTCGTGCCGGTAAAATTCCGGCCCCGGAAGGCACCGCAG  
CACAGGCAATTGCATGGCATCGCGATCTGGATGGCCGCCTGCTGAGTCCGCAT  
GTTGCCGCAGTGGAAGTGGTGAATGTTCTGCGCCCCGACCGTTGCAATTGCAGT  
GTATATTACCTTCGTTGCCCATGCACTGCATACCCATCCGGGCATTCGCGAAGC  
ACTGCGCCAGGATCCGGATTATGCAGAACTGTTTCGTGCAGGAAGTGCCTCGCT  
TCTATCCGTTCTTCCCGGCCGTTGTTGCCCGCGCCCCGCCAAGACTTCGAATGG  
GAAGGTTATGCCTTCCCGGAAGGTCGTCAGGTTGTGCTGGATCTGTATGGTACC  
AATCATGATGCCGCCATCTGGGAAGATCCGCAGGAATTCCGCCCGGAACGCTT  
CCGTGATTGGGATGAAGATCCGTTCAACTTCATTCCGCAGGGTGGTGGCGATCA  
TCAGCTGGGCCATCGTTGCCCGGGTGAATGGATTGTGCTGGCAATTATGAAAGT  
TGCAGCACATCTGCTGGTTAATGCCATGCGCTATGATGTTCCGCCGCAGGATCT  
GAGCATTGACTTCAGTCGCCTGCCGGCCCTGCCGAAAAGTGGCTTCGTGATGC  
GCAATGTTTCATATTGGTGGTTAAActcgag

Protein sequence:

MPKTPHTKGPDETLALLADPYRFISRQCQRLGTNAFETRFLKKTICLRGAKAAEIFY  
DTTRFQRHGAMPKAIQKTLLGQGGVQGLDGEAHRHRKQMFMSLMTPERVRALAQ  
LFEAEWRRRAVERWTRKGEIVFYDELHEILTRAVCAWAGVPLPDDEAEKRARELRAL  
FDAAGSASPRHLWSRWARRRVDAAWAKRIIEGIRAGKIPAPEGTAQAIAWHRDLG  
RLLSPHVAAVELVNLRPTVAIAVYITFVAHALHTHPGIREALRQDPDYAELFVQEV

RFYPPFFPAVVARARQDFEWEGYAFPEGRQVVL DLYGTNHDAAIWEDPQEFRPERF  
RDWDEDPFNFIPQGGGDHQLGHRCPGEWIVLAIMKVA AHLLVNAMRYDVPPQDLSI  
DFSRLPALPKSGFVMRNVHIGG

**PO<sub>CLA</sub>** (pEG 306)

Optimised DNA sequence

catATGCTGCTGAAAGAAAACACCGCCAAAGATAAAGGTATTGATAGCACCCCTGG  
ATCTGCTGAAAGAGGGTTACCTGTTTATCAAAAATCGTGCCGATCATTATCAGAG  
CGACCTGTTTCAAACCCGTCTGATGGGTCAGCGTATTATTTGTATGACCGGTGA  
AGAAGCAGCCCGTATCTTTTATGATAGCGATAAATTCAAACGTCAGGGTGCAGC  
ACCGAAACGTGTTCAAGAAACCCTGCTGGGTGAAAATGCAATTCAGACCCTGGA  
TGGTGAAAGCCATCTGCATCGTAAAAAACTGTTTATGCTGCTGACCAATCAGGTT  
CAGCAGAAACGTCTGGCAGAACTGACCACCGAAAAATGGGAAGCAAGCGCAAG  
CAAATGGCATAACAAAAGCATTGTGCTGTTTAAACGAAGCCAATGAAATTCTGTGT  
CAGGTTGCATGTCATTGGGCAGGCGTTCCGCTGATGGAAAGCGATATCAAAAAC  
CGTGCGGAAGATTTTAGCAGCATGATTGATAGCTTTGGTGCAGTTGGTCCGCGT  
CATTGGAAAGGTAAAAAAGCACGTAATACCATTGAGGCCTGGATCAAAGAAATT  
ATTGAAAATGTTTCGTAGCGGTTCGCATTTCGTGCAGAAGAGGGTAGTCCGCTGCAT  
GAAATTGCCTTTTATATCGATGTTAATGGCCAGCAGATGCCTGCAGAAATGGCA  
GCAATTGAACTGATTAACATTCTGCGTCCGATTGTTGCAATTAGCACCTTTATTA  
CCTTTAGCGCACTGGCACTGTATGAACATAGCGAATATCGCGAAAAAACTGCAGA  
GCAAAGATATCCGTTATCTGGAAATGTTTACCCAAGAAGTGCGTTCGTTATTACCC  
GTTTGCACCGTTTGTGGTGCACGTGTTTCGTAAAGATTTTCTGTGGAATAACTGC  
GAGTTCAAAAAGAAATGCTGGTGTCTGGATATTTATGGCACCAATCATGATA  
GCCGTATTTGGCAGAAACCGTATGAATTTATTCCGGATCGTTTCCGCAGCTATAA  
AGGTAACCTGTTTCGATTTTATTCCGCAGGGTGGTGGTGGTATCCGAGCAGTACCCA  
TCGTTGTCCGGGTGAAGGTATTACCCTGGAAATCATGAAAACCAGCCTGGATTT  
TCTGAGCACCAAATTGATTTTACCGTTCCGGATCAGGATCTGAGCTATAGCCT  
GAGCAAATTCGACCCTGCCGAAAAGCGGTTTTATCATTGATAACATCAACCT  
GAAACTGTAActcgag

Protein sequence:

MLLKENTAKDKGIDSTLDLLKEGYLFIKNRADHYQSDFETRLMGQR IICMTGEEAAR  
IFYDSDKFKRQGAAPKR VQETLLGENAIQTLDGESH LHRK KLFMLLTN QVQQKRLAE  
LTTEKWEASASKWHTKSIVLFNEANEILCQVACHWAGVPLMESDIKNRAEDFSSMID  
SFGAVGPRHWKGGKARNTIEAWIKEI IENVRSGRIRAE EGSPLHEIAFYIDVNGQQM  
PAEMAAIELINILRPIVAISTFITFSALALYEHSEYREKLQSKDIRYLEMFTQEVR RYYP  
FAPFVGARVRKDFLWNNCEFKKEMLVLLDIYGTNHDSRIWQKPYEFIPDRFRSYKG  
NLDFIPQGGGDPSSTHRCPEGITL EIMKTS LDFLSTKIDFTVPDQDLSYSLSKIPTL  
PKSGFIIDNINLKL

## Analytical methods

### Gas chromatography coupled with flame ionization detector

For quantitative and chiral analysis of biotransformations for the  $\alpha$ -hydroxylation of **1a-d**, samples were measured by gas chromatography coupled with a flame ionization detector (GC-FID) using an Agilent 7890A GC system.

#### Method GC-01:

|                           |                                        |
|---------------------------|----------------------------------------|
| Column:                   | HP-5ms (30 m x 0.25 mm x 0.25 $\mu$ m) |
| Carrier gas:              | Helium                                 |
| Inlet temperature:        | 250 °C                                 |
| Detector temperature:     | 300 °C                                 |
| Injection volume:         | 2 $\mu$ L                              |
| Split ratio:              | 50:1                                   |
| Oven temperature program: | 100 °C, 0.5 min; 10 °C/min to 300 °C   |
| Total run time:           | 20.5 min                               |

#### Method GC-02:

|                           |                                                                       |
|---------------------------|-----------------------------------------------------------------------|
| Column:                   | CP-Chirasil-Dex CB (25 m x 0.32 mm x 0.25 $\mu$ m)                    |
| Carrier gas:              | Hydrogen                                                              |
| Inlet temperature:        | 250 °C                                                                |
| Detector temperature:     | 250 °C                                                                |
| Injection volume:         | 2 $\mu$ L                                                             |
| Split ratio:              | 50:1                                                                  |
| Oven temperature program: | 100 °C, 1 min; 10 °C/min to 130 °C, 5 min; 10 °C/min to 180 °C, 1 min |
| Total run time:           | 15 min                                                                |

## Gas chromatography coupled with mass spectrometer

For qualitative information, biotransformations were analysed *via* gas chromatography coupled with a mass spectrometer (GC-MS) using an Agilent 8890 GC system with a mass-selective Agilent 5977C detector (electron impact ionization, 70 eV, quadrupole mass selection, mass scan = 33-400 m/z). An HP-5ms column (Agilent J&W, 30 m x 250  $\mu$ m x 0.25  $\mu$ m, stationary phase: bonded and cross-linked 5% phenyl methyl polysiloxane) was used with helium as carrier gas at a flow rate of 0.7 mL/min.

### Method GC-03:

|                               |                                        |
|-------------------------------|----------------------------------------|
| Column:                       | HP-5ms (30 m x 0.25 mm x 0.25 $\mu$ m) |
| Inlet temperature:            | 250 °C                                 |
| MS transfer line temperature: | 300 °C                                 |
| MS source temperature:        | 230 °C                                 |
| MS quadrupole temperature:    | 150 °C                                 |
| MS scan range:                | m/z = 33-400                           |
| Split ratio:                  | 90:1                                   |
| Oven temperature program:     | 100 °C, 0.5 min; 10 °C/min to 300 °C   |
| Total run time:               | 20.5 min                               |

## GC-chromatograms & MS-spectra

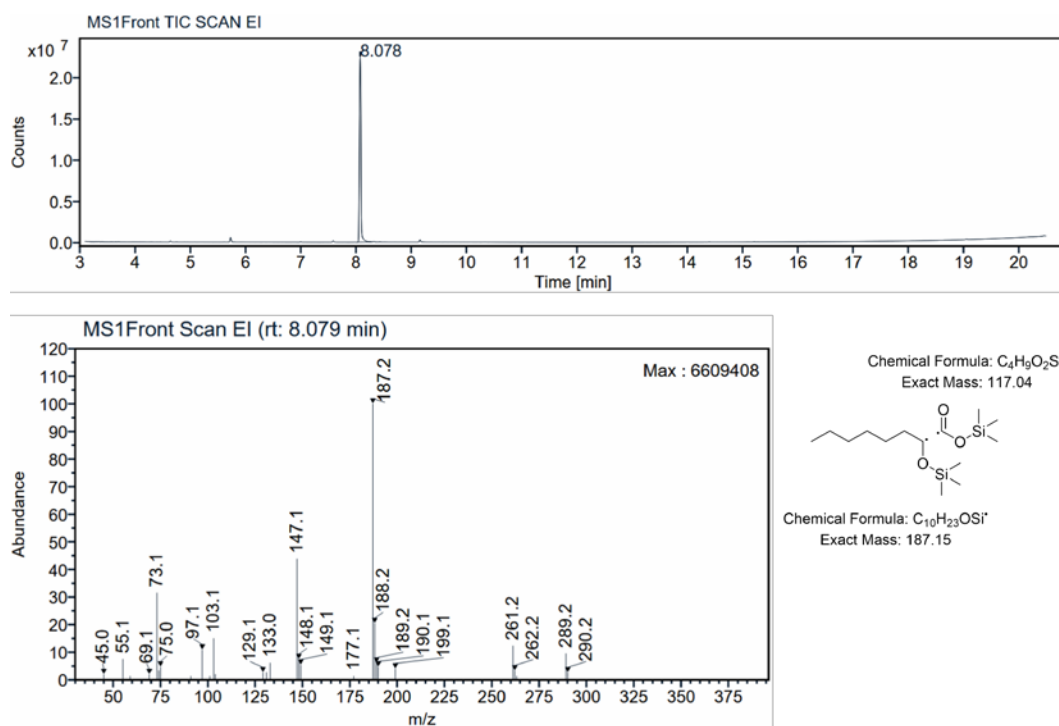

Figure S8: GC-MS chromatogram and MS-spectrum for **2a** derivatised with BSTFA-TMCS. Method GC-03.

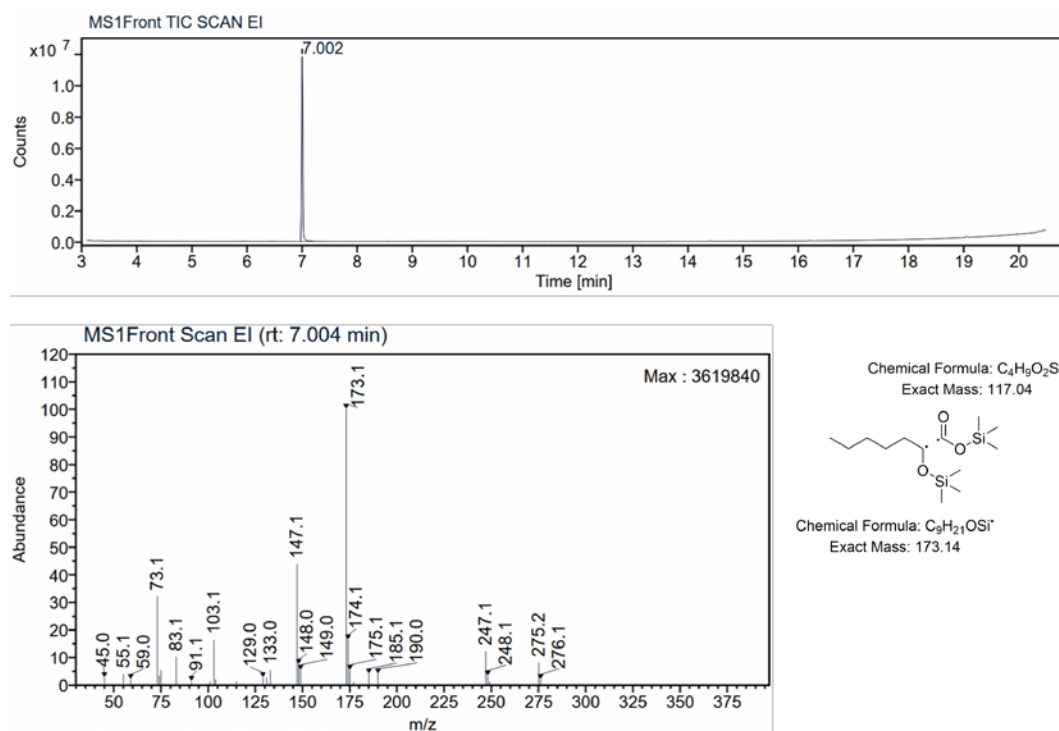

Figure S9: GC-MS chromatogram and MS-spectrum for **2b** derivatised with BSTFA-TMCS. Method GC-03.

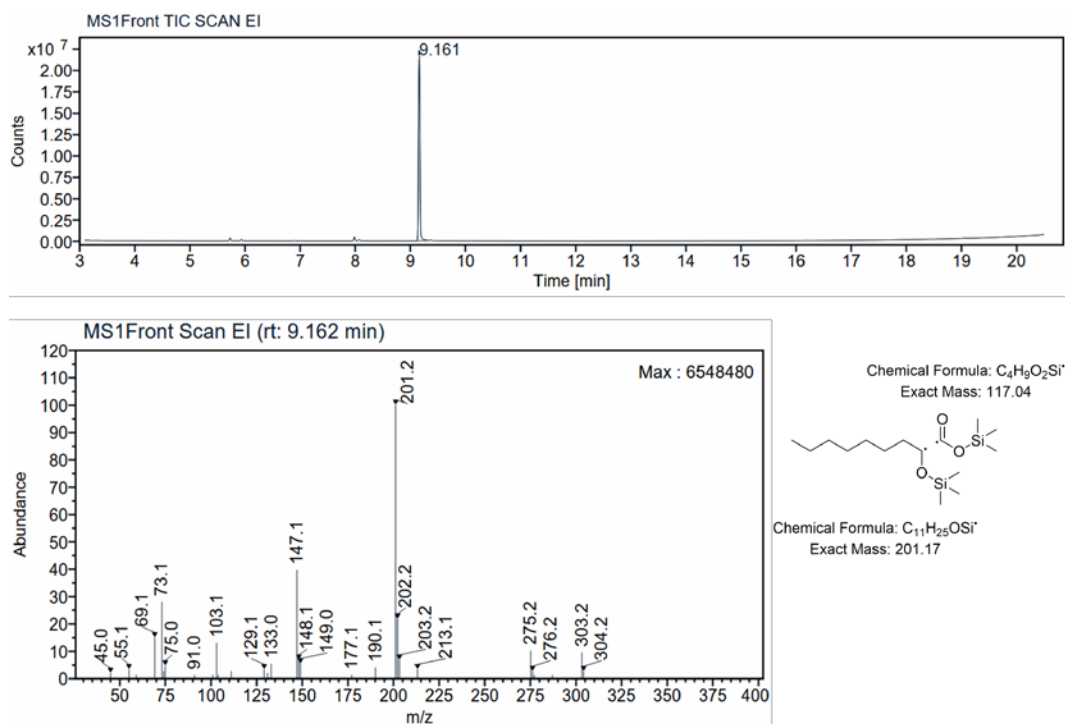

Figure S10: GC-MS chromatogram and MS-spectrum for **2c** derivatised with BSTFA-TMCS. Method GC-03.

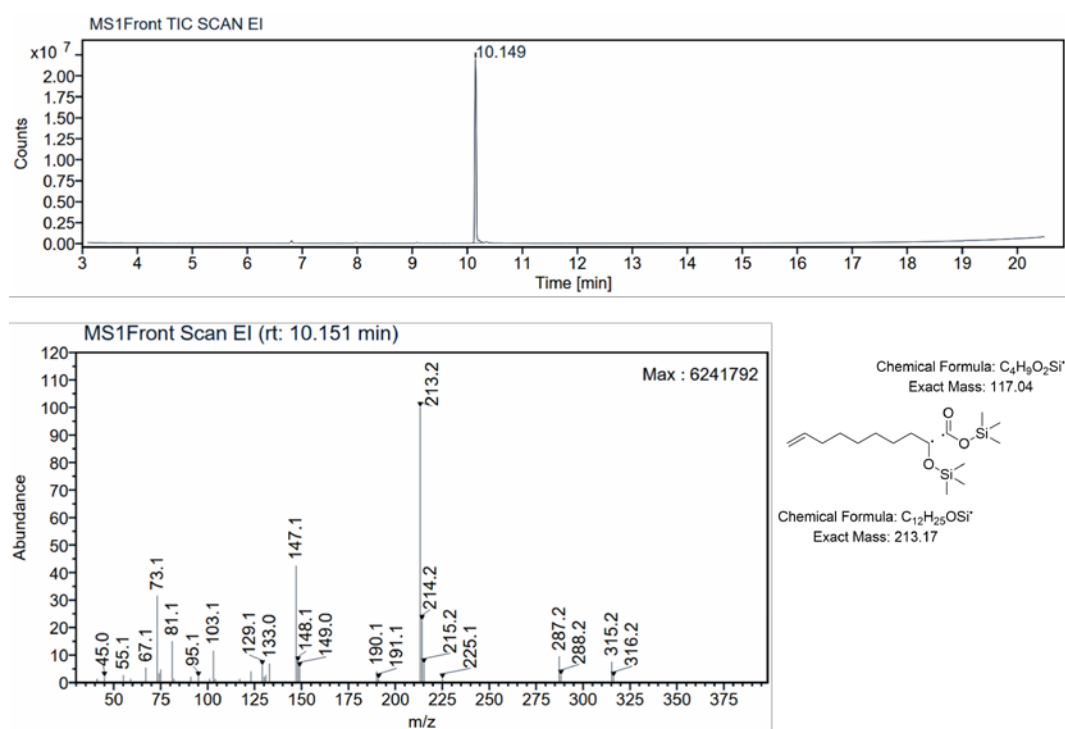

Figure S11: GC-MS chromatogram and MS-spectrum for **2d** derivatised with BSTFA-TMCS. Method GC-03.

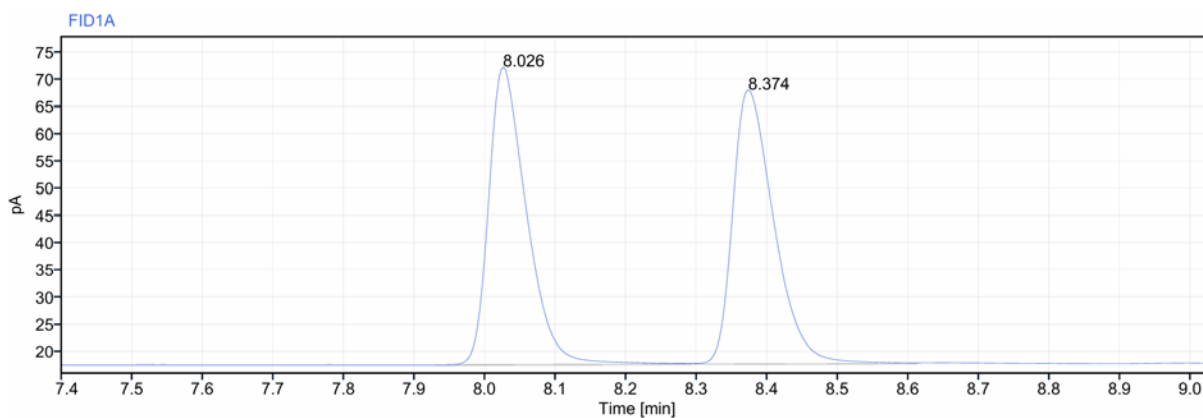

Figure S12: GC-FID chromatogram of *rac*-**2a** derivatised with MeOH/ethyl chloroformate. (*R*)-**2a** (8.026 min), (*S*)-**2a** (8.374 min). Method GC-02.

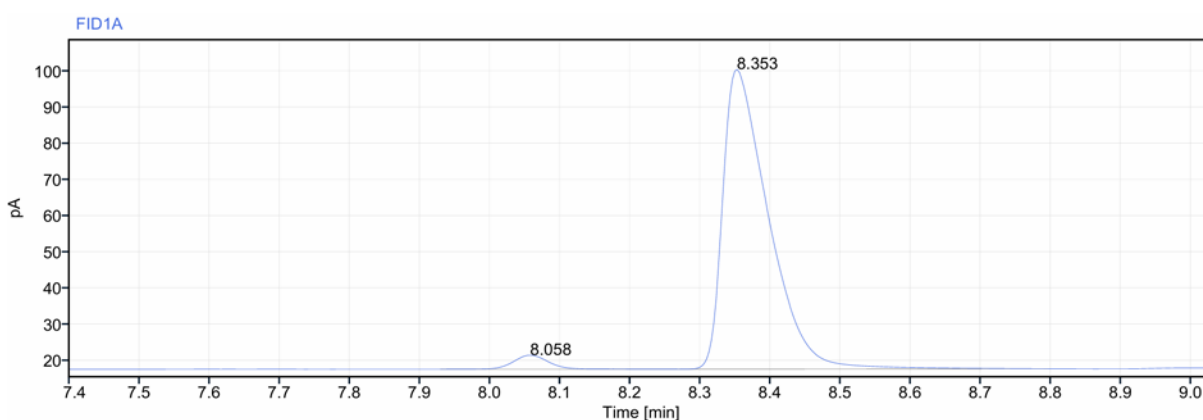

Figure S13: GC-FID chromatogram of MeOH/ethyl chloroformate-derivatised **2a** formed in the  $\alpha$ -hydroxylation of **1a** by  $PO_{SPa}$  variant V3-P04. (*R*)-**2a** (8.058 min), (*S*)-**2a** (8.353 min). Method GC-02.

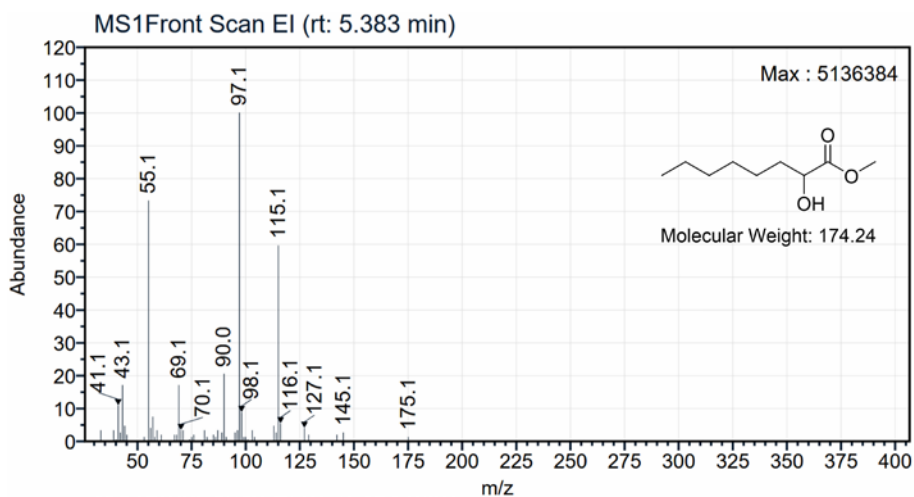

Figure S14: MS-Spectrum of **2a** derivatised with MeOH/ethyl chloroformate.

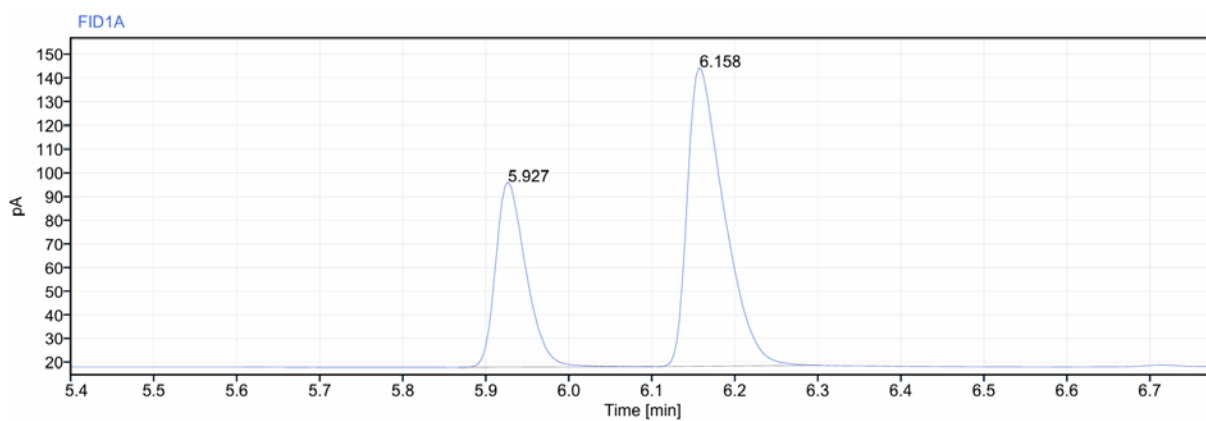

Figure S15: GC-FID chromatogram of MeOH/ethyl chloroformate-derivatised **2b** formed in the  $\alpha$ -hydroxylation of **1b** by  $PO_{CLA}$ . (R)-**2b** (5.927 min), (S)-**2b** (6.158 min). Method GC-02.

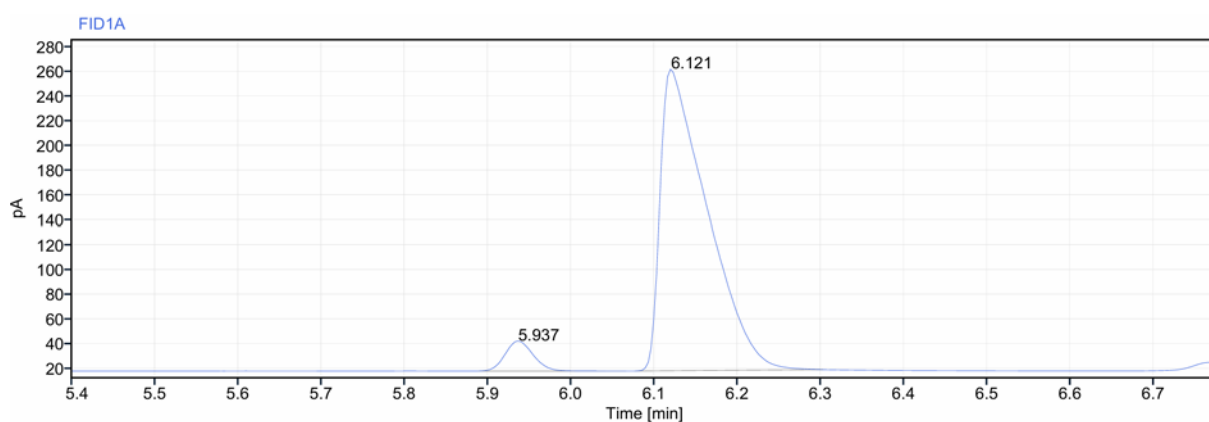

Figure S16: GC-FID chromatogram of MeOH/ethyl chloroformate-derivatised **2b** formed in the  $\alpha$ -hydroxylation of **1b** by  $PO_{SPa}$  variant V3-P04. (R)-**2b** (5.937 min), (S)-**2b** (6.121 min). Method GC-02.

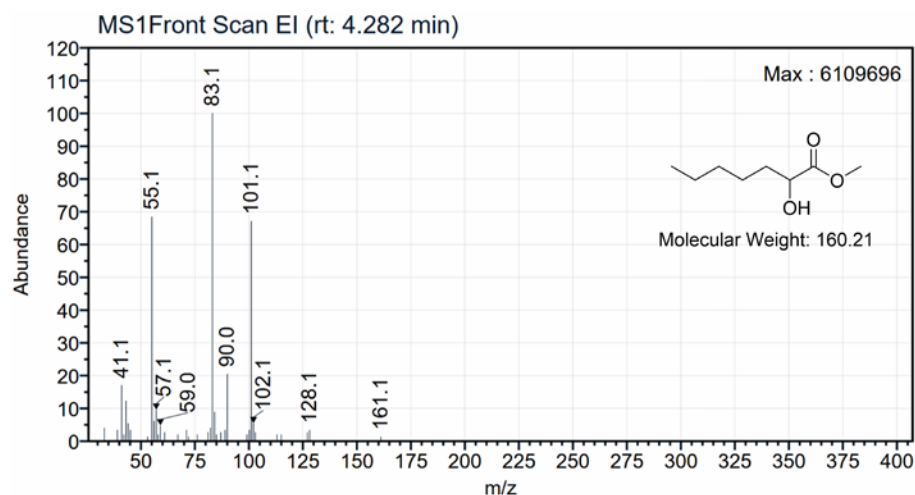

Figure S17: MS-Spectrum of **2b** derivatised with MeOH/ethyl chloroformate.

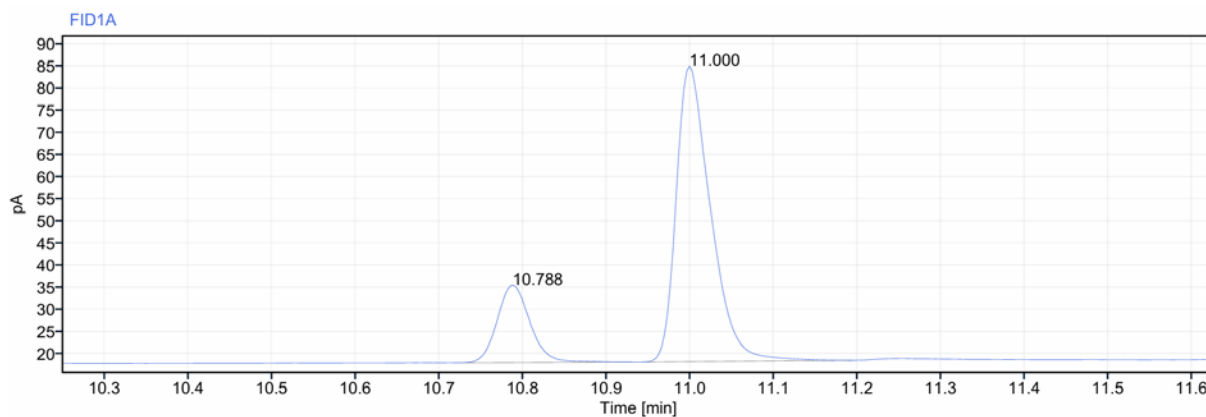

Figure S18: GC-FID chromatogram of MeOH/ethyl chloroformate-derivatised **2c** formed in the  $\alpha$ -hydroxylation of **1c** by  $PO_{CLA}$ . (R)-**2c** (10.788 min), (S)-**2c** (11.000 min). Method GC-02.

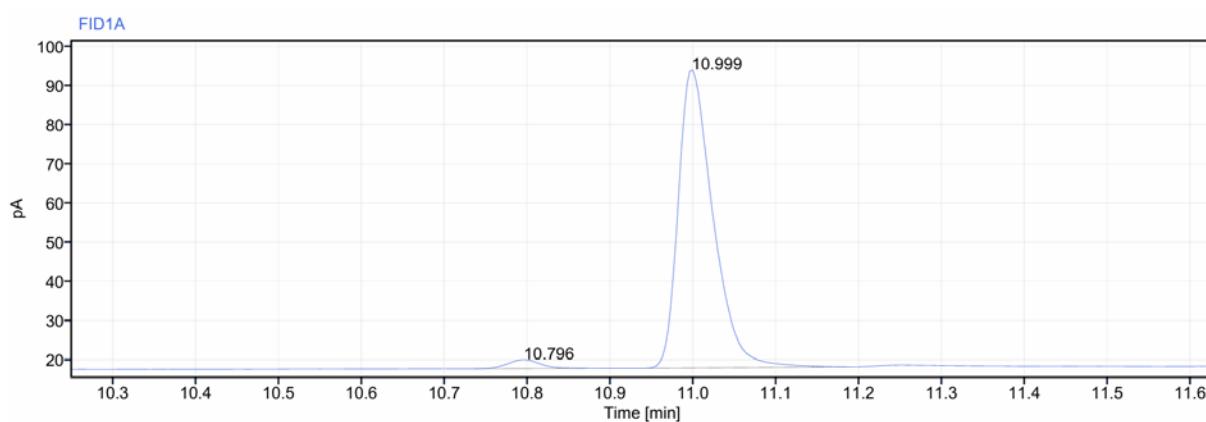

Figure S19: GC-FID chromatogram of MeOH/ethyl chloroformate-derivatised **2c** formed in the  $\alpha$ -hydroxylation of **1c** by  $PO_{SP\alpha}$  variant V3-P04. (R)-**2c** (10.796 min), (S)-**2c** (10.999 min). Method GC-02.

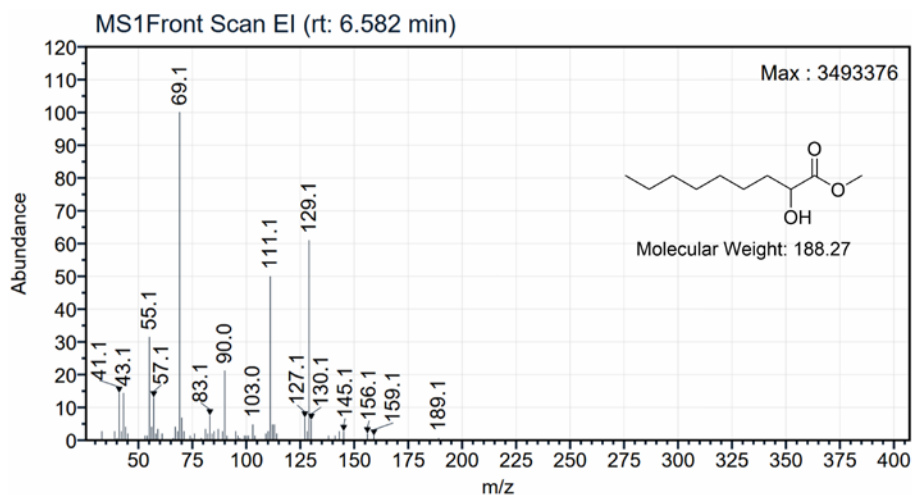

Figure S20: MS-Spectrum of **2c** derivatised with MeOH/ethyl chloroformate.

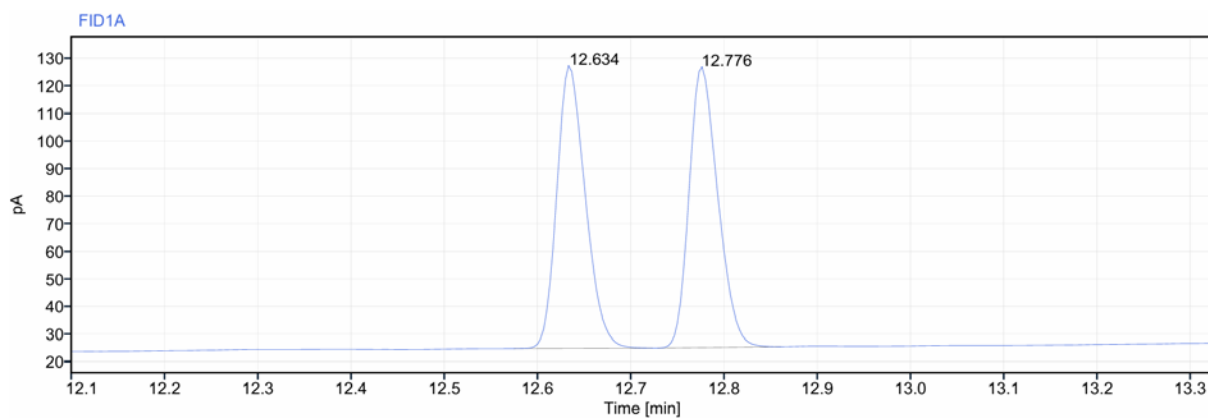

Figure S21: GC-FID chromatogram of rac-2-hydroxydecanoic acid (**2e**) derivatised with MeOH/ethyl chloroformate. (*R*)-**2e** (12.634 min), (*S*)-**2e** (12.776 min). Method GC-02. Retention times of **2d** and **2e** were found to be identical.

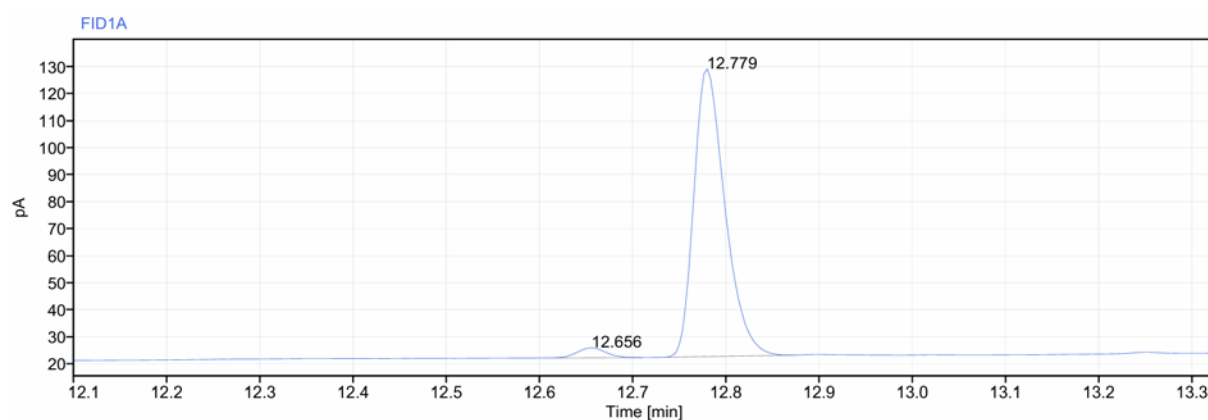

Figure S22: GC-FID chromatogram of MeOH/ethyl chloroformate-derivatised **2d** formed in the  $\alpha$ -hydroxylation of **1d** by  $PO_{SP\alpha}$  variant V3-P4. (*R*)-**2d** (12.656 min), (*S*)-**2d** (12.779 min). Method GC-02.

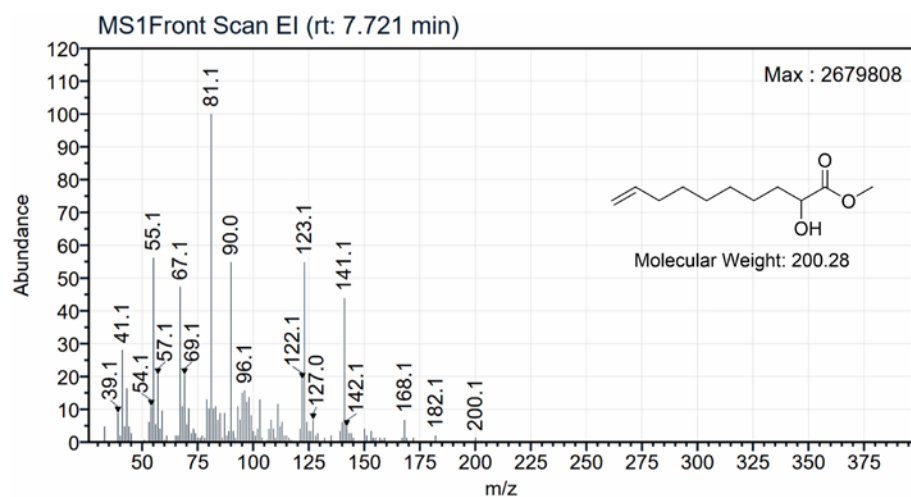

Figure S23: MS-Spectrum of **2d** derivatised with MeOH/ethyl chloroformate.

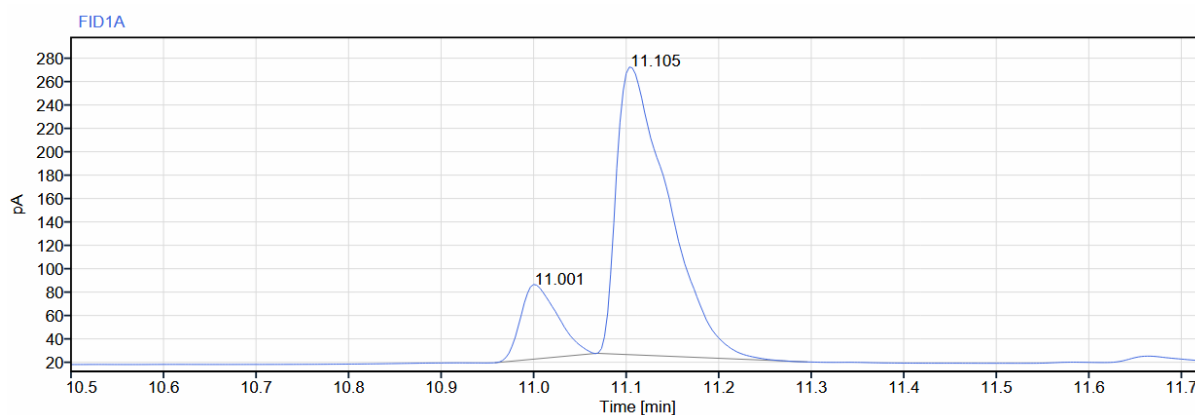

Figure S24: GC-FID chromatogram of MeOH/ethyl chloroformate-derivatised **2d** formed in the  $\alpha$ -hydroxylation of **1d** by  $PO_{CLA}$ . Method GC-02. The shift in retention times and change in peak shape compared to Figure S22 is due to the use of an older, more spent column.

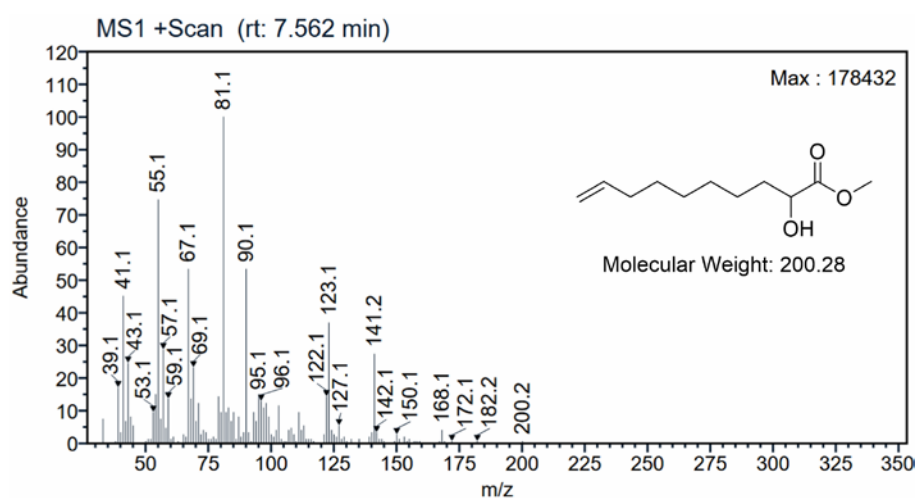

Figure S25: MS-Spectrum of **2d** formed in the  $\alpha$ -hydroxylation of **1d** by  $PO_{CLA}$  and derivatised with MeOH/ethyl chloroformate.

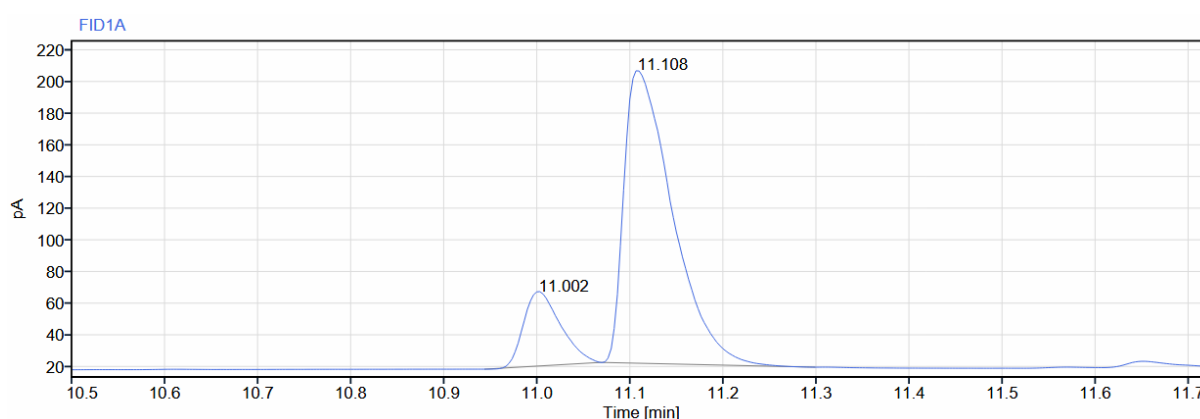

Figure S26: GC-FID chromatogram of MeOH/ethyl chloroformate-derivatised **2e** formed in the hydrogenation of **2d**. Method GC-02. The shift in retention times and change in peak shape compared to Figure S21 is due to the use of an older, more spent column.

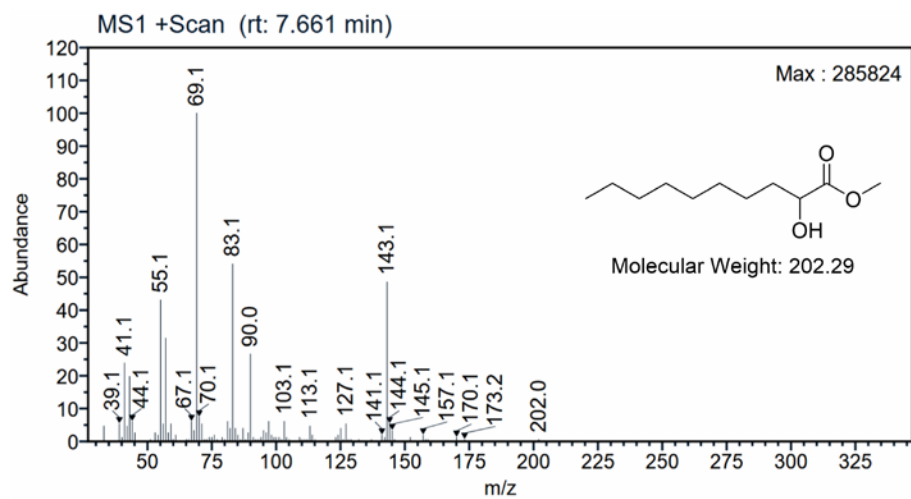

Figure S27: MS-Spectrum of **2e** formed in the hydrogenation of **2d** and derivatised with MeOH/ethyl chloroformate.

# $^1\text{H}$ - and $^{13}\text{C}$ -NMR

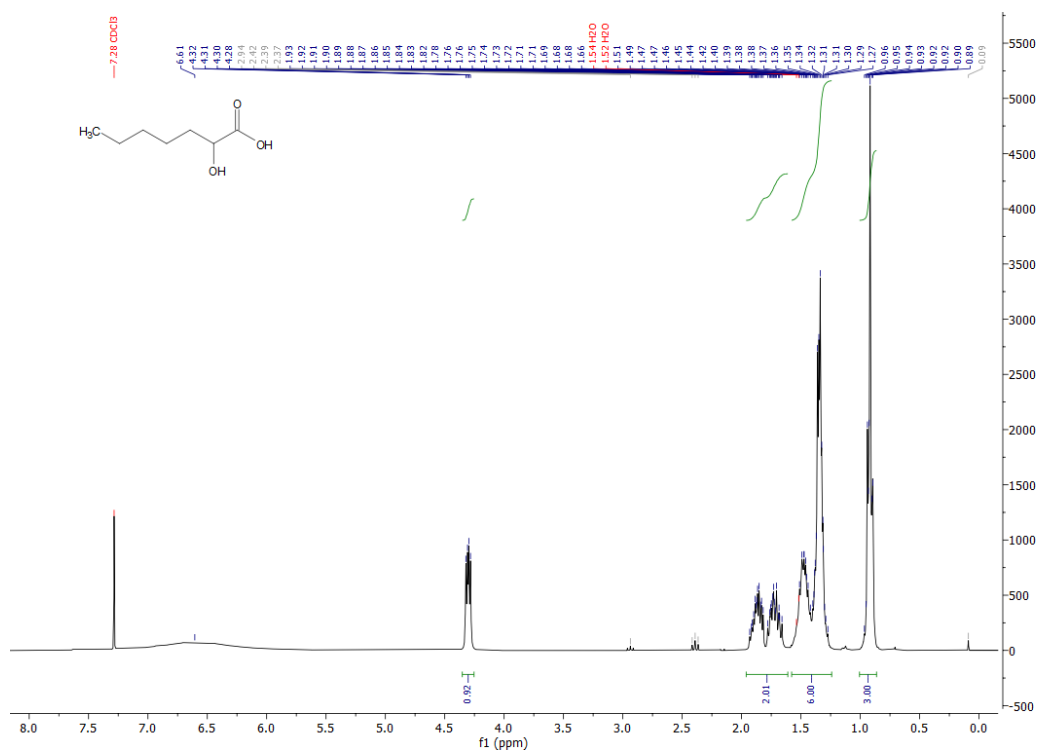

Figure S28:  $^1\text{H}$  NMR (300 MHz,  $\text{CDCl}_3$ ) of **2b** isolated from the preparative-scale experiment conducted with  $\text{POCl}_3$ .

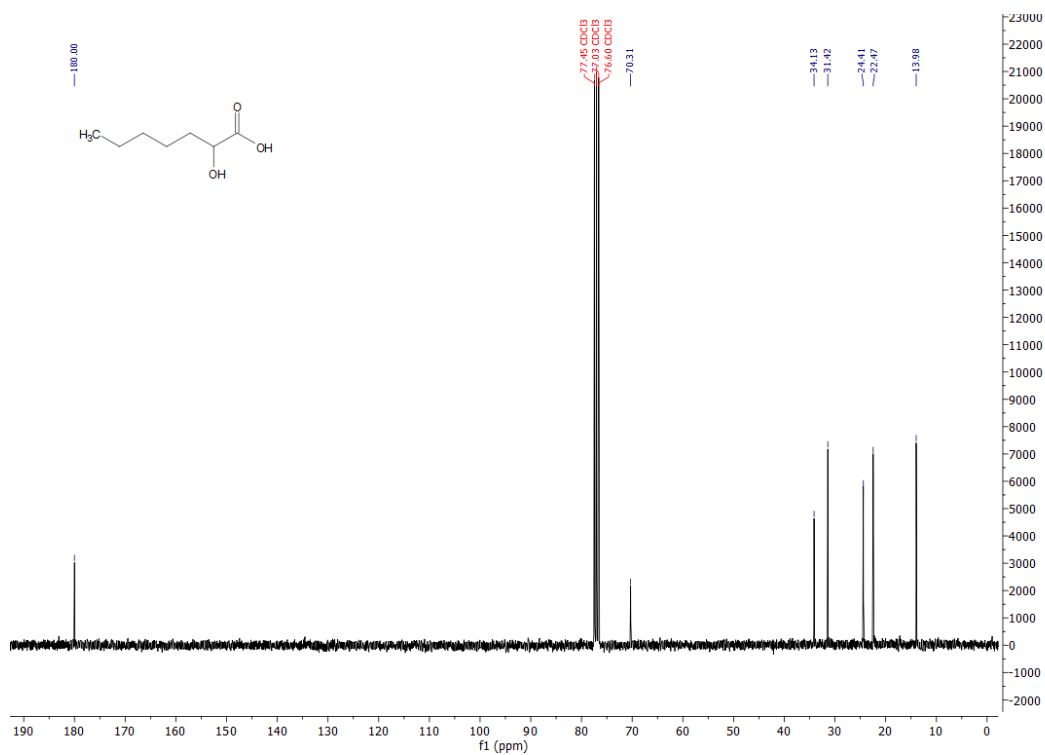

Figure S29:  $^{13}\text{C}$  NMR (75 MHz,  $\text{CDCl}_3$ ) of **2b** isolated from the preparative-scale experiment conducted with  $\text{POCl}_3$ .

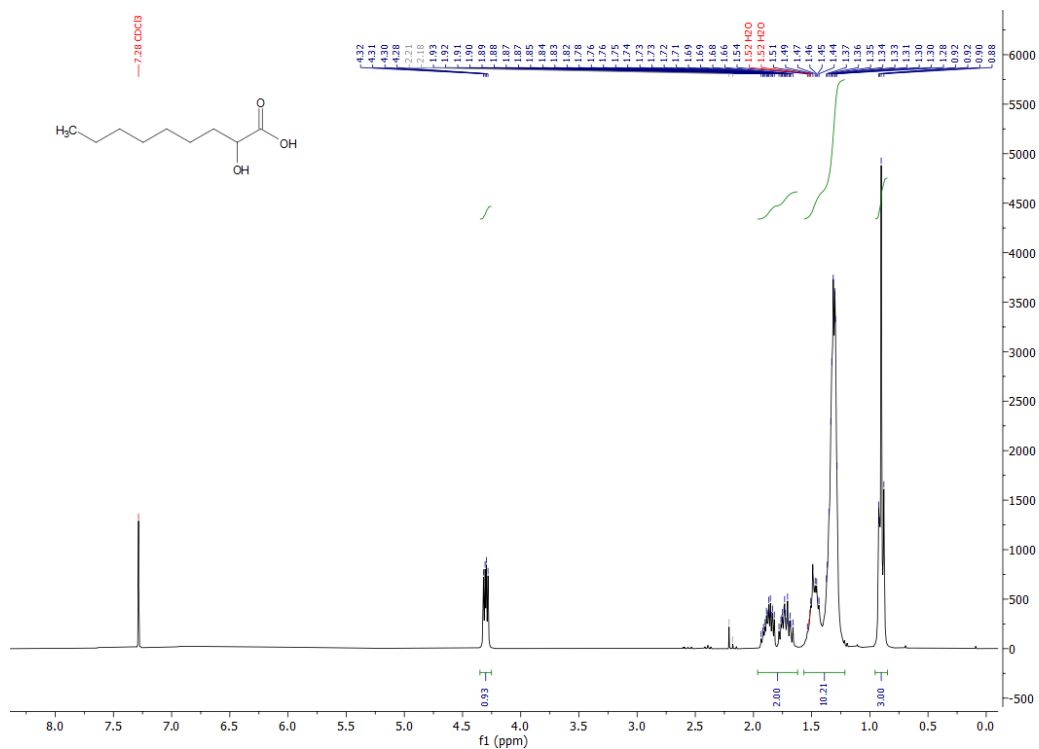

Figure S30: <sup>1</sup>H NMR (300 MHz, CDCl<sub>3</sub>) of **2c** isolated from the preparative-scale experiment conducted with PO<sub>CL</sub>A.

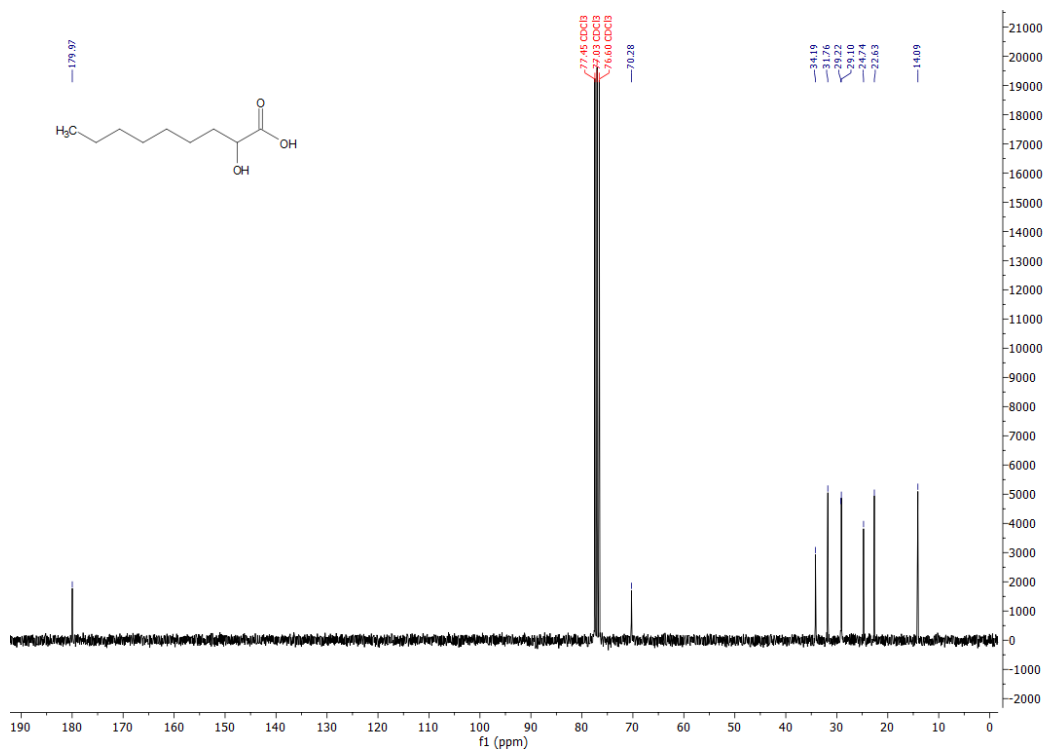

Figure S31: <sup>13</sup>C NMR (75 MHz, CDCl<sub>3</sub>) of **2c** isolated from the preparative-scale experiment conducted with PO<sub>CL</sub>A.

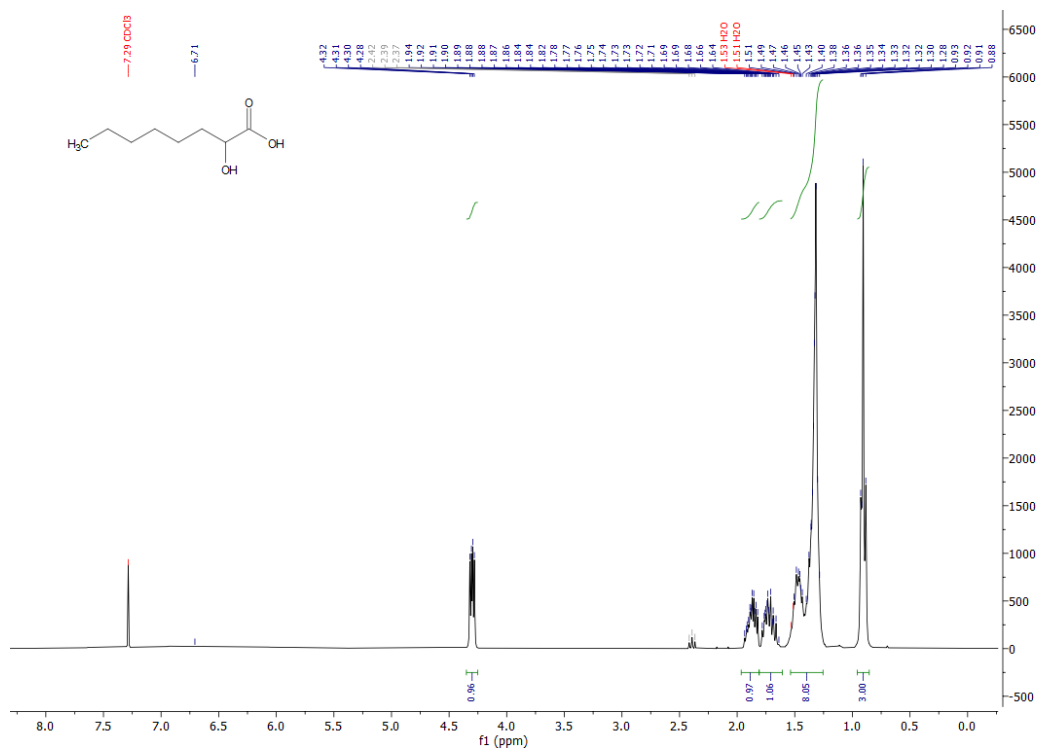

Figure S32:  $^1\text{H}$  NMR (300 MHz,  $\text{CDCl}_3$ ) of **2a** isolated from the preparative-scale experiment conducted with  $\text{PO}_{\text{SP}\alpha}$  V3-P04.

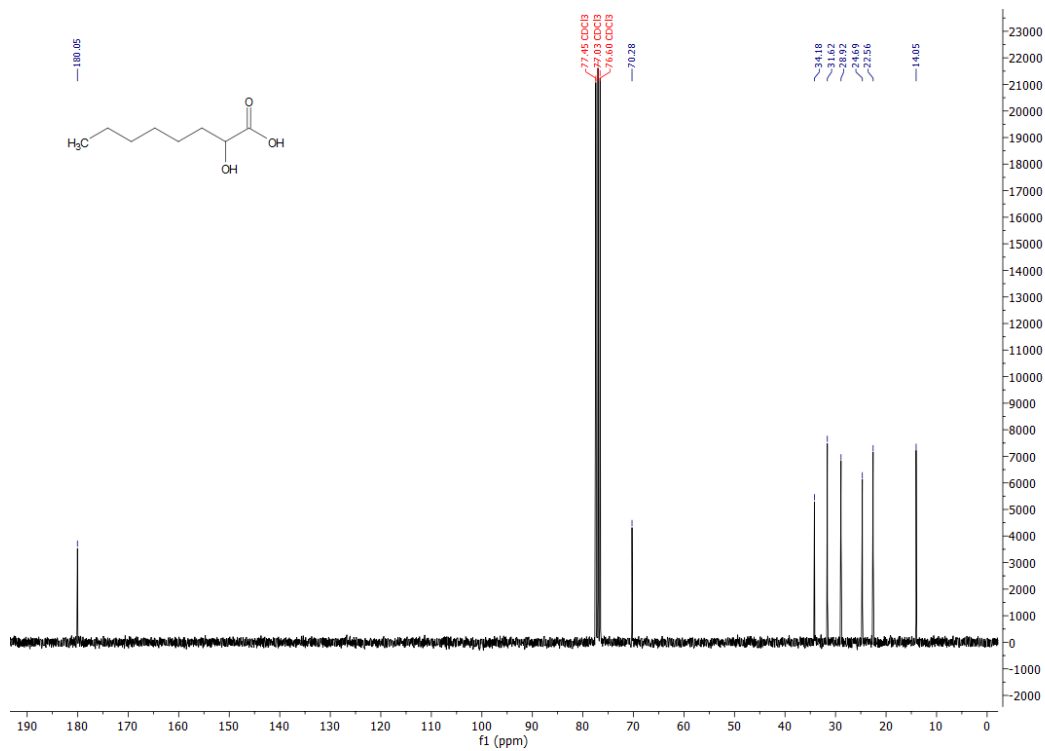

Figure S33:  $^{13}\text{C}$  NMR (75 MHz,  $\text{CDCl}_3$ ) of **2a** isolated from the preparative-scale experiment conducted with  $\text{PO}_{\text{SP}\alpha}$  V3-P04.

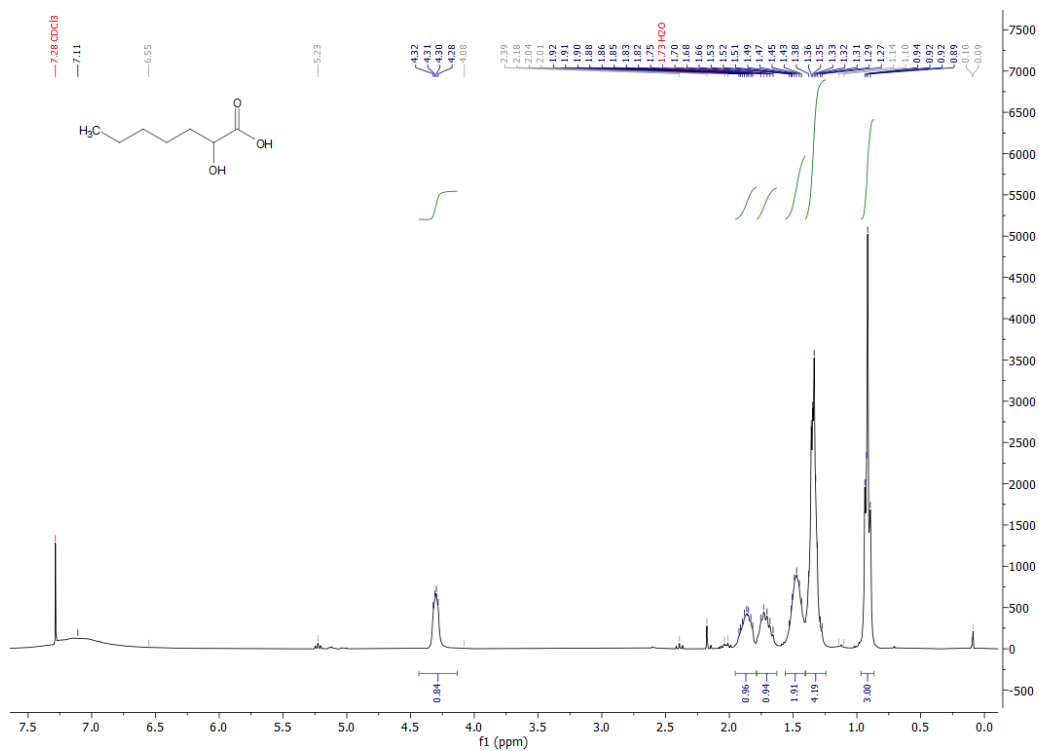

Figure S34: <sup>1</sup>H NMR (300 MHz, CDCl<sub>3</sub>) of **2b** isolated from the preparative-scale experiment conducted with PO<sub>SPα</sub> V3-P04.

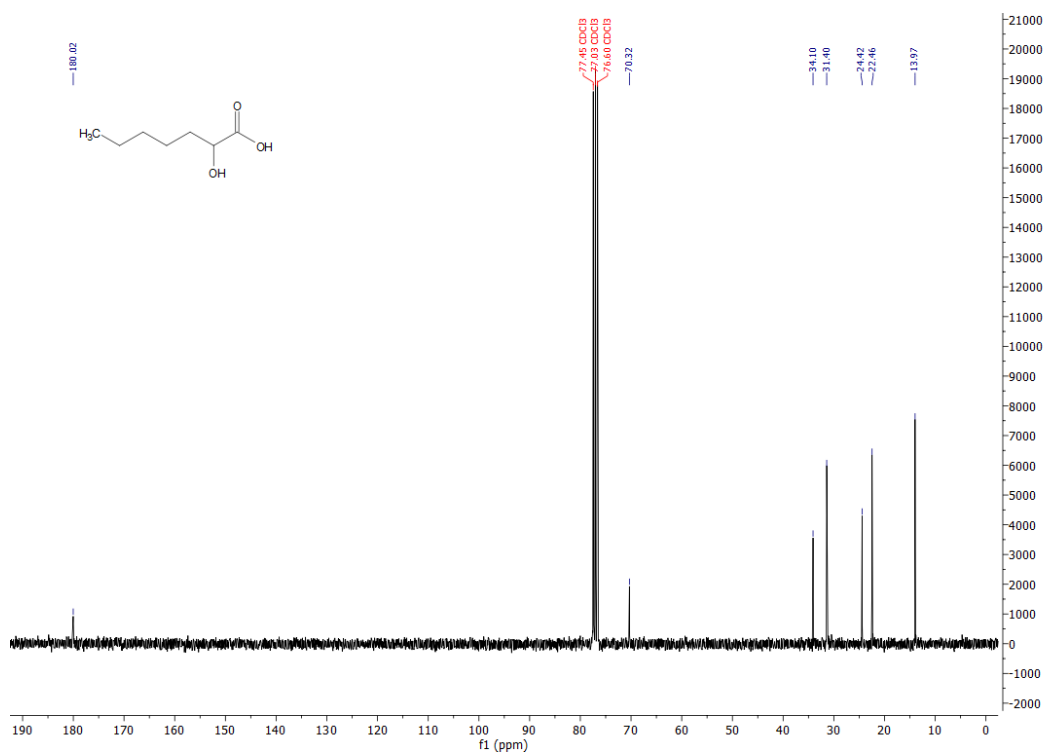

Figure S35: <sup>13</sup>C NMR (75 MHz, CDCl<sub>3</sub>) of **2b** isolated from the preparative-scale experiment conducted with PO<sub>SPα</sub> V3-P04.

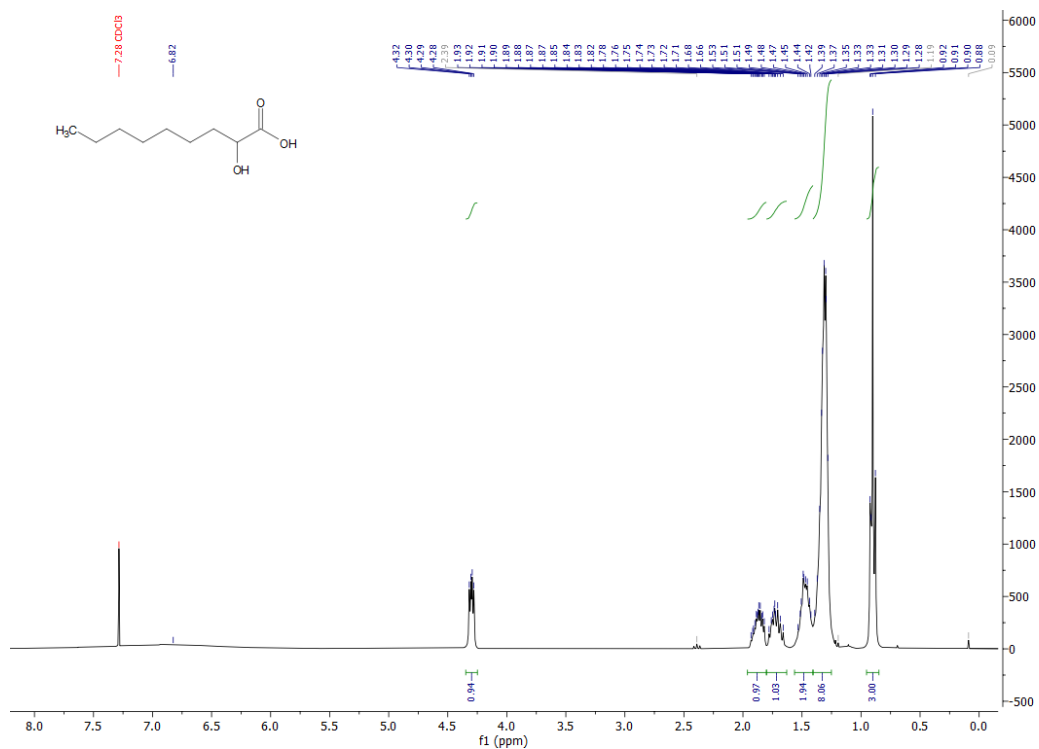

Figure S36: <sup>1</sup>H NMR (300 MHz, CDCl<sub>3</sub>) of **2c** isolated from the preparative-scale experiment conducted with PO<sub>SPα</sub> V3-P04.

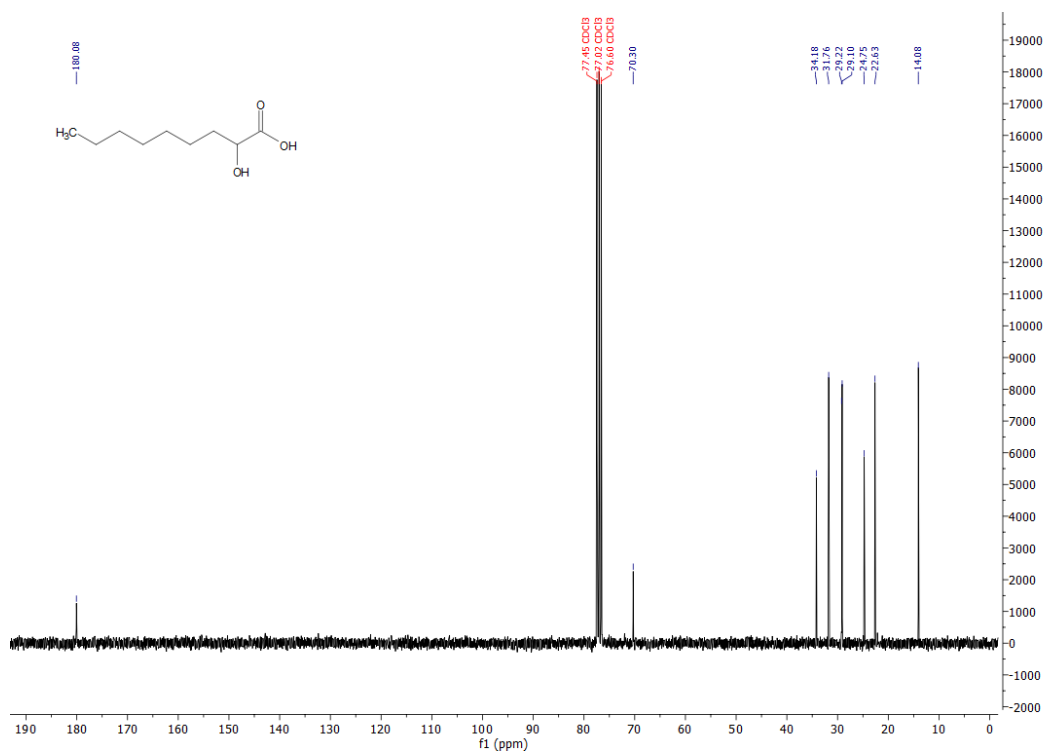

Figure S37: <sup>13</sup>C NMR (75 MHz, CDCl<sub>3</sub>) of **2c** isolated from the preparative-scale experiment conducted with PO<sub>SPα</sub> V3-P04.



## Literature

1. F. P. Guengerich, M. V. Martin, C. D. Sohl and Q. Cheng, *Nature Protocols*, 2009, **4**, 1245-1251.
2. R. A. Friesner, J. L. Banks, R. B. Murphy, T. A. Halgren, J. J. Klicic, D. T. Mainz, M. P. Repasky, E. H. Knoll, M. Shelley, J. K. Perry, D. E. Shaw, P. Francis and P. S. Shenkin, *J. Med. Chem.*, 2004, **47**, 1739-1749.
3. M. M. Aboelnga, *RSC Adv.*, 2022, **12**, 15543-15554.
